# Supplementary material for: Transcriptomic comparison of communally reared wild, domesticated and hybrid Atlantic salmon fry under stress and control conditions
Source: BMC Genet. 2020 May 29;21:57. doi: 10.1186/s12863-020-00858-y (PMC7257211; doi:10.1186/s12863-020-00858-y)
Supplement: Supplementary file 1 — Additional file 1. The complete lists of KEGG pathways identified by the gage function [file 12863_2020_858_MOESM1_ESM.xlsx]

## Sheet: domesticated vs wild control
	p.geomean	stat.mean	p.val	q.val	set.size	C.MM.1	C.MM.2	C.MM.3	C.MM.4	C.MM.5	C.MM.6	Direction	Functional group	KEGG Sub-group	Pathway
ko04510 Focal adhesion	0.0863997	1.26913	0.00099233	0.0135476	98	0.134677	0.0286343	0.134049	0.0756638	0.0930116	0.240549	2D	Cellular Processes	Cell communication	Focal adhesion
ko04540 Gap junction	0.14431	0.940788	0.0113456	0.0516227	39	0.068815	0.355537	0.152867	0.0866805	0.131097	0.413176	2D	Cellular Processes	Cell communication	Gap junction
ko04111 Cell cycle - yeast	0.153208	0.955338	0.0100516	0.0995206	54	0.144925	0.31347	0.170377	0.0786654	0.256183	0.129827	Up	Cellular Processes	Cell growth and death	Cell cycle - yeast
ko04144 Endocytosis	0.0747765	-1.35458	0.000480624	0.0145789	105	0.107321	0.0228362	0.250914	0.0720159	0.0717292	0.10521	Down	Cellular Processes	Transport and catabolism	Endocytosis
ko04144 Endocytosis	0.103175	1.15962	0.00234396	0.0203143	105	0.179932	0.0422148	0.0995788	0.197961	0.157328	0.125702	2D	Cellular Processes	Transport and catabolism	Endocytosis
ko04146 Peroxisome	0.134052	1.06833	0.00465829	0.0706507	54	0.243353	0.111726	0.189126	0.132643	0.115919	0.102847	Up	Cellular Processes	Transport and catabolism	Peroxisome
ko04145 Phagosome	0.0517108	-1.54878	8.35866e-05	0.00304255	76	0.0649455	0.0402749	0.0873639	0.092348	0.060568	0.0423199	Down	Cellular Processes	Transport and catabolism	Phagosome
ko04020 Calcium signaling pathway	0.0870994	1.30537	0.000742719	0.0122886	72	0.0231052	0.142913	0.153608	0.0539717	0.13644	0.159272	2D	Environmental Information Processing	Signal transduction	Calcium signaling pathway
ko04390 Hippo signaling pathway	0.154326	0.947611	0.0104693	0.0501426	67	0.173432	0.0981661	0.29418	0.186796	0.225955	0.107467	2D	Environmental Information Processing	Signal transduction	Hippo signaling pathway
ko04391 Hippo signaling pathway - fly	0.130953	1.0736	0.00471955	0.0318133	29	0.134991	0.0658511	0.12312	0.279879	0.188412	0.131105	2D	Environmental Information Processing	Signal transduction	Hippo signaling pathway - fly
ko04630 Jak-STAT signaling pathway	0.146688	0.988734	0.00805588	0.0431227	56	0.167917	0.163051	0.217615	0.167292	0.149647	0.121641	2D	Environmental Information Processing	Signal transduction	Jak-STAT signaling pathway
ko04010 MAPK signaling pathway	0.101314	1.22885	0.00135298	0.0144849	110	0.0502873	0.101518	0.145334	0.107672	0.13014	0.156164	2D	Environmental Information Processing	Signal transduction	MAPK signaling pathway
ko04064 NF-kappa B signaling pathway	0.148628	0.959304	0.00974424	0.0479311	64	0.0886556	0.0838628	0.227795	0.150204	0.366205	0.192177	2D	Environmental Information Processing	Signal transduction	NF-kappa B signaling pathway
ko04330 Notch signaling pathway	0.092847	1.27631	0.00111656	0.0135476	21	0.1533	0.0935957	0.0667578	0.181227	0.115215	0.0621137	2D	Environmental Information Processing	Signal transduction	Notch signaling pathway
ko04151 PI3K-Akt signaling pathway	0.132681	1.05109	0.00510994	0.0320693	149	0.15472	0.0839525	0.114231	0.284702	0.0942185	0.209782	2D	Environmental Information Processing	Signal transduction	PI3K-Akt signaling pathway
ko04668 TNF signaling pathway	0.187868	0.833328	0.0211027	0.0872882	63	0.16767	0.21166	0.230153	0.189455	0.17261	0.257887	2D	Environmental Information Processing	Signal transduction	TNF signaling pathway
ko04514 Cell adhesion molecules (CAMs)	0.0302719	1.83086	4.56598e-06	0.000277003	64	0.0441998	0.0294066	0.0330852	0.0237825	0.0255394	0.0661606	2D	Environmental Information Processing	Signaling molecules and interaction	Cell adhesion molecules (CAMs)
ko04060 Cytokine-cytokine receptor interaction	0.0263255	-1.74159	1.2053e-05	0.000548413	94	0.013481	0.0461892	0.0659832	0.00174484	0.300107	0.0671006	Down	Environmental Information Processing	Signaling molecules and interaction	Cytokine-cytokine receptor interaction
ko04060 Cytokine-cytokine receptor interaction	0.008936	2.34726	6.2197e-09	5.65993e-07	94	0.0043051	0.00207015	0.0282937	0.0096056	0.0124795	0.0248788	2D	Environmental Information Processing	Signaling molecules and interaction	Cytokine-cytokine receptor interaction
ko04080 Neuroactive ligand-receptor interaction	0.0737522	-1.01553	0.00684987	0.0958982	112	0.00191829	0.257158	0.140256	0.146454	0.576489	0.288882	Down	Environmental Information Processing	Signaling molecules and interaction	Neuroactive ligand-receptor interaction
ko04080 Neuroactive ligand-receptor interaction	0.00164603	2.89191	1.31227e-12	2.38833e-10	112	0.000181326	0.0014543	0.00658083	0.00256464	0.00167649	0.0085818	2D	Environmental Information Processing	Signaling molecules and interaction	Neuroactive ligand-receptor interaction
ko03020 RNA polymerase	0.139813	1.02721	0.00655002	0.0796045	27	0.100927	0.0974989	0.18806	0.0918093	0.373835	0.166377	Up	Genetic Information Processing	Transcription	RNA polymerase
ko03010 Ribosome	0.080974	1.27036	0.000983883	0.0223833	118	0.0529013	0.0267548	0.0371686	0.16373	0.345325	0.191762	Up	Genetic Information Processing	Translation	Ribosome
ko03008 Ribosome biogenesis in eukaryotes	0.0520995	1.36498	0.000485772	0.0126301	64	0.024098	0.100926	0.0321525	0.0581281	0.542117	0.0651292	Up	Genetic Information Processing	Translation	Ribosome biogenesis in eukaryotes
ko03013 RNA transport	0.120409	0.954447	0.0100133	0.0995206	111	0.01275	0.093714	0.251466	0.06814	0.595736	0.40989	Up	Genetic Information Processing	Translation	RNA transport
ko00330 Arginine and proline metabolism	0.160681	0.946409	0.0108066	0.0995206	36	0.0782365	0.100566	0.254541	0.286721	0.10032	0.334192	Up	Metabolism	Amino acid metabolism	Arginine and proline metabolism
ko00520 Amino sugar and nucleotide sugar metabolism	0.0507635	1.61932	4.78783e-05	0.00435693	35	0.050688	0.052396	0.0816364	0.0229997	0.049182	0.105094	Up	Metabolism	Carbohydrate metabolism	Amino sugar and nucleotide sugar metabolism
ko00051 Fructose and mannose metabolism	0.115352	1.15887	0.0027687	0.0559892	19	0.0901411	0.0450072	0.243897	0.0606219	0.1191	0.368153	Up	Metabolism	Carbohydrate metabolism	Fructose and mannose metabolism
ko00052 Galactose metabolism	0.0750014	1.40417	0.000461874	0.0126301	16	0.131233	0.021831	0.0625917	0.298136	0.0936505	0.0553607	Up	Metabolism	Carbohydrate metabolism	Galactose metabolism
ko00010 Glycolysis / Gluconeogenesis	0.149812	0.963343	0.00988712	0.0995206	30	0.0796659	0.0701272	0.190535	0.445031	0.271136	0.11447	Up	Metabolism	Carbohydrate metabolism	Glycolysis / Gluconeogenesis
ko00534 Glycosaminoglycan biosynthesis - heparan sulfate / heparin	0.138488	1.05862	0.00622835	0.0354238	11	0.211008	0.188954	0.119676	0.0492794	0.337272	0.117413	2D	Metabolism	Glycan biosynthesis and metabolism	Glycosaminoglycan biosynthesis - heparan sulfate / heparin
ko00533 Glycosaminoglycan biosynthesis - keratan sulfate	0.195879	0.829653	0.0240787	0.0912984	11	0.1283	0.18915	0.187126	0.327717	0.225807	0.230516	2D	Metabolism	Glycan biosynthesis and metabolism	Glycosaminoglycan biosynthesis - keratan sulfate
ko00514 Other types of O-glycan biosynthesis	0.191916	0.832951	0.0226619	0.0883449	16	0.252421	0.188279	0.234944	0.187109	0.19802	0.186233	2D	Metabolism	Glycan biosynthesis and metabolism	Other types of O-glycan biosynthesis
ko01040 Biosynthesis of unsaturated fatty acids	0.115814	1.15318	0.00307973	0.0560511	15	0.385066	0.136418	0.198662	0.0459379	0.101813	0.0645667	Up	Metabolism	Lipid metabolism	Biosynthesis of unsaturated fatty acids
ko00561 Glycerolipid metabolism	0.130077	1.03318	0.00656081	0.0796045	25	0.415407	0.102038	0.067475	0.129537	0.176926	0.148805	Up	Metabolism	Lipid metabolism	Glycerolipid metabolism
ko00120 Primary bile acid biosynthesis	0.12203	1.13506	0.0037568	0.062158	12	0.258047	0.1203	0.0899889	0.148037	0.0989703	0.146422	Up	Metabolism	Lipid metabolism	Primary bile acid biosynthesis
ko00600 Sphingolipid metabolism	0.0511025	1.59266	7.7637e-05	0.00470998	21	0.0275656	0.0511193	0.0761017	0.0367409	0.0516467	0.194207	Up	Metabolism	Lipid metabolism	Sphingolipid metabolism
ko00240 Pyrimidine metabolism	0.127963	1.02397	0.00633081	0.0796045	73	0.172769	0.0787147	0.177296	0.0666895	0.295108	0.216304	Up	Metabolism	Nucleotide metabolism	Pyrimidine metabolism
ko00982 Drug metabolism - cytochrome P450	0.130738	-1.124	0.00389896	0.070961	11	0.103942	0.0749625	0.266554	0.0733491	0.167594	0.217734	Down	Metabolism	Xenobiotics biodegradation and metabolism	Drug metabolism - cytochrome P450
ko04270 Vascular smooth muscle contraction	0.110751	1.14602	0.00267807	0.0211917	55	0.171886	0.216099	0.162862	0.0420287	0.0914211	0.147614	2D	Organismal Systems	Circulatory system	Vascular smooth muscle contraction
ko04360 Axon guidance	0.125067	-1.04435	0.00562583	0.0930819	52	0.309897	0.118271	0.0729433	0.0600832	0.288073	0.168075	Down	Organismal Systems	Development	Axon guidance
ko04360 Axon guidance	0.0350536	1.78957	7.3901e-06	0.00033625	52	0.0861776	0.0301438	0.019779	0.0300299	0.0344062	0.0537709	2D	Organismal Systems	Development	Axon guidance
ko04320 Dorso-ventral axis formation	0.133606	1.08243	0.00536289	0.0325349	11	0.197017	0.125901	0.18608	0.149469	0.0902179	0.163291	2D	Organismal Systems	Development	Dorso-ventral axis formation
ko04380 Osteoclast differentiation	0.0878841	1.31459	0.000686645	0.0122886	69	0.0472193	0.0902778	0.123626	0.119313	0.102757	0.110114	2D	Organismal Systems	Development	Osteoclast differentiation
ko04976 Bile secretion	0.0564	1.52982	0.000110945	0.00504801	39	0.0688199	0.0113747	0.115016	0.112658	0.0401828	0.131015	Up	Organismal Systems	Digestive system	Bile secretion
ko04976 Bile secretion	0.102558	1.18677	0.00202918	0.0194374	39	0.110328	0.199011	0.0483456	0.178881	0.0664242	0.188032	2D	Organismal Systems	Digestive system	Bile secretion
ko04975 Fat digestion and absorption	0.0425388	1.67699	3.7639e-05	0.00435693	19	0.218584	0.0321709	0.0160757	0.0452264	0.00964186	0.185367	Up	Organismal Systems	Digestive system	Fat digestion and absorption
ko04978 Mineral absorption	0.0555382	1.46701	0.000245211	0.0089257	25	0.30035	0.0587943	0.0286664	0.140487	0.0345455	0.0490979	Up	Organismal Systems	Digestive system	Mineral absorption
ko04974 Protein digestion and absorption	0.129499	1.03729	0.00597571	0.0350832	40	0.150121	0.0657671	0.0804607	0.294075	0.135607	0.284605	2D	Organismal Systems	Digestive system	Protein digestion and absorption
ko04970 Salivary secretion	0.131517	1.08075	0.00443023	0.0310116	32	0.0516502	0.250699	0.152423	0.148692	0.116578	0.197803	2D	Organismal Systems	Digestive system	Salivary secretion
ko04977 Vitamin digestion and absorption	0.125925	1.08049	0.00505071	0.0320693	17	0.157996	0.0797998	0.0603199	0.230228	0.173332	0.254467	2D	Organismal Systems	Digestive system	Vitamin digestion and absorption
ko04920 Adipocytokine signaling pathway	0.181053	0.871627	0.0171252	0.0742092	35	0.105904	0.186516	0.165308	0.299614	0.168565	0.278202	2D	Organismal Systems	Endocrine system	Adipocytokine signaling pathway
ko04915 Estrogen signaling pathway	0.16191	0.933195	0.0116908	0.0518956	40	0.106098	0.308532	0.118756	0.186799	0.149213	0.243535	2D	Organismal Systems	Endocrine system	Estrogen signaling pathway
ko04912 GnRH signaling pathway	0.180206	0.831888	0.021736	0.0879101	39	0.128885	0.29587	0.127779	0.25832	0.143507	0.334435	2D	Organismal Systems	Endocrine system	GnRH signaling pathway
ko04911 Insulin secretion	0.0793245	1.36397	0.000486127	0.00983056	37	0.0309542	0.0947909	0.0953895	0.0573267	0.231146	0.100318	2D	Organismal Systems	Endocrine system	Insulin secretion
ko04913 Ovarian steroidogenesis	0.181378	0.854106	0.0195889	0.082911	22	0.130533	0.177747	0.164968	0.155715	0.400691	0.221917	2D	Organismal Systems	Endocrine system	Ovarian Steroidogenesis
ko03320 PPAR signaling pathway	0.146718	0.944865	0.0109363	0.0995206	42	0.346021	0.104965	0.403796	0.109662	0.0857403	0.129985	Up	Organismal Systems	Endocrine system	PPAR signaling pathway
ko04917 Prolactin signaling pathway	0.1416	0.981953	0.00864635	0.0437121	39	0.0876131	0.136964	0.223162	0.184718	0.159931	0.23351	2D	Organismal Systems	Endocrine system	Prolactin signaling pathway
ko04918 Thyroid hormone synthesis	0.0899828	1.28427	0.000960608	0.0135476	33	0.0588753	0.0960017	0.0506067	0.140976	0.186526	0.130506	2D	Organismal Systems	Endocrine system	Thyroid hormone synthesis
ko04713 Circadian entrainment	0.103926	1.2206	0.00151947	0.0153635	45	0.107823	0.160321	0.0817484	0.103034	0.0871737	0.155728	2D	Organismal Systems	Environmental adaptation	Circadian entrainment
ko04961 Endocrine and other factor-regulated calcium reabsorption	0.18771	0.829217	0.0228144	0.0883449	20	0.222387	0.257589	0.210277	0.225293	0.171776	0.165016	2D	Organismal Systems	Excretory system	Endocrine and other factor-regulated calcium reabsorption
ko04662 B cell receptor signaling pathway	0.148357	0.985712	0.00835567	0.0434495	39	0.139937	0.0993205	0.120784	0.250121	0.207908	0.201381	2D	Organismal Systems	Immune system	B cell receptor signaling pathway
ko04062 Chemokine signaling pathway	0.0222559	-1.952	1.06415e-06	9.68373e-05	88	0.0234802	0.0155867	0.0151593	0.0103129	0.158633	0.0232745	Down	Organismal Systems	Immune system	Chemokine signaling pathway
ko04062 Chemokine signaling pathway	0.0399685	1.72621	1.32735e-05	0.000483157	88	0.0288174	0.034342	0.0578543	0.0413318	0.0278144	0.0885889	2D	Organismal Systems	Immune system	Chemokine signaling pathway
ko04610 Complement and coagulation cascades	0.0143407	-2.07989	2.77425e-07	5.04913e-05	56	0.00186774	0.0116014	0.0901604	0.0342316	0.0121464	0.0465802	Down	Organismal Systems	Immune system	Complement and coagulation cascades
ko04664 Fc epsilon RI signaling pathway	0.11917	1.09519	0.00414283	0.0301598	29	0.187909	0.123618	0.0777619	0.190484	0.0606593	0.281374	2D	Organismal Systems	Immune system	Fc epsilon RI signaling pathway
ko04640 Hematopoietic cell lineage	0.0820058	-1.12858	0.00335953	0.0679371	38	0.0196808	0.0769005	0.150305	0.128257	0.460323	0.188563	Down	Organismal Systems	Immune system	Hematopoietic cell lineage
ko04640 Hematopoietic cell lineage	0.0857135	1.26759	0.00110384	0.0135476	38	0.030668	0.148671	0.0769408	0.0740326	0.255653	0.145723	2D	Organismal Systems	Immune system	Hematopoietic cell lineage
ko04650 Natural killer cell mediated cytotoxicity	0.029288	-1.87028	3.32288e-06	0.000201588	40	0.0169035	0.0755037	0.0112698	0.0199406	0.115839	0.025962	Down	Organismal Systems	Immune system	Natural killer cell mediated cytotoxicity
ko04650 Natural killer cell mediated cytotoxicity	0.0708963	1.41984	0.000296879	0.006754	40	0.0469634	0.0707839	0.0315069	0.124677	0.147648	0.113131	2D	Organismal Systems	Immune system	Natural killer cell mediated cytotoxicity
ko04621 NOD-like receptor signaling pathway	0.147831	1.00269	0.00755429	0.0416631	31	0.0902862	0.0969601	0.237802	0.233004	0.148881	0.20327	2D	Organismal Systems	Immune system	NOD-like receptor signaling pathway
ko04660 T cell receptor signaling pathway	0.0454907	1.61101	4.69467e-05	0.00142405	61	0.0591052	0.0291237	0.0151748	0.0702176	0.0853792	0.135286	2D	Organismal Systems	Immune system	T cell receptor signaling pathway
ko04620 Toll-like receptor signaling pathway	0.0614029	1.50724	0.000129809	0.00337504	48	0.0817759	0.0541848	0.0695695	0.111362	0.0344542	0.0762399	2D	Organismal Systems	Immune system	Toll-like receptor signaling pathway
ko04725 Cholinergic synapse	0.104081	1.17381	0.00221612	0.0201667	45	0.123895	0.233747	0.0527375	0.139671	0.0630709	0.195474	2D	Organismal Systems	Nervous system	Cholinergic synapse
ko04728 Dopaminergic synapse	0.0911142	1.2457	0.00124936	0.0142114	54	0.183432	0.236303	0.0356412	0.166265	0.0304006	0.127608	2D	Organismal Systems	Nervous system	Dopaminergic synapse
ko04724 Glutamatergic synapse	0.114776	1.15554	0.00248332	0.0205438	50	0.0918341	0.127506	0.117246	0.154261	0.0732759	0.225346	2D	Organismal Systems	Nervous system	Glutamatergic synapse
ko04720 Long-term potentiation	0.161219	0.943296	0.0111873	0.0516227	28	0.106474	0.277745	0.227551	0.217525	0.118639	0.146832	2D	Organismal Systems	Nervous system	Long-term potentiation
ko04723 Retrograde endocannabinoid signaling	0.116523	1.13034	0.00302577	0.0229454	46	0.077735	0.32969	0.0908274	0.138672	0.0460535	0.224771	2D	Organismal Systems	Nervous system	Retrograde endocannabinoid signaling
ko04726 Serotonergic synapse	0.0991	-1.20759	0.00169732	0.0386141	49	0.114271	0.0654147	0.100456	0.0457782	0.21365	0.241684	Down	Organismal Systems	Nervous system	Serotonergic synapse
ko04721 Synaptic vesicle cycle	0.111739	-1.0367	0.00624945	0.0947833	35	0.201645	0.240918	0.058423	0.0751422	0.250333	0.18434	Down	Organismal Systems	Nervous system	Synaptic vesicle cycle
ko04744 Phototransduction	0.104403	-1.25429	0.00144242	0.0375028	14	0.131722	0.170275	0.108868	0.154108	0.0885638	0.0519423	Down	Organismal Systems	Sensory system	Phototransduction

## Sheet: domesticated vs wild stress
	p.geomean	stat.mean	p.val	q.val	set.size	T.MM.1	T.MM.2	T.MM.3	T.MM.4	T.MM.5	T.MM.6	Direction	Functional group	KEGG Sub-group	Pathway
ko04510 Focal adhesion	0.0943138	1.25738	0.00108332	0.0151664	98	0.0776426	0.0421594	0.0788448	0.150703	0.179591	0.158515	2D	Cellular Processes	Cell communication	Focal adhesion
ko04540 Gap junction	0.160073	0.86139	0.0184828	0.0840968	39	0.161087	0.232585	0.177096	0.385004	0.0531506	0.289198	2D	Cellular Processes	Cell communication	Gap junction
ko04111 Cell cycle - yeast	0.116458	1.09718	0.00384805	0.0466896	54	0.379174	0.0887223	0.113929	0.332649	0.0544636	0.051516	Up	Cellular Processes	Cell growth and death	Cell cycle - yeast
ko04144 Endocytosis	0.127612	-1.04295	0.00546564	0.0828956	105	0.108514	0.50152	0.0656093	0.151966	0.0497905	0.206457	Down	Cellular Processes	Transport and catabolism	Endocytosis
ko04144 Endocytosis	0.151836	0.939843	0.0108928	0.0639514	105	0.0959594	0.22441	0.164143	0.0939857	0.42335	0.142417	2D	Cellular Processes	Transport and catabolism	Endocytosis
ko04146 Peroxisome	0.0981411	1.2195	0.00152954	0.0274808	54	0.104978	0.115169	0.161804	0.104342	0.222704	0.0363896	Up	Cellular Processes	Transport and catabolism	Peroxisome
ko04145 Phagosome	0.0157713	-2.11593	1.4664e-07	1.33443e-05	76	0.0147649	0.0243098	0.0121209	0.00536375	0.0314039	0.0403398	Down	Cellular Processes	Transport and catabolism	Phagosome
ko02010 ABC transporters	0.0762213	1.22928	0.00166093	0.0274808	27	0.293935	0.133641	0.0456351	0.0451379	0.0825491	0.220565	Up	Environmental Information Processing	Membrane transport	ABC transporters
ko04020 Calcium signaling pathway	0.0940923	1.26661	0.00101984	0.0151664	72	0.081798	0.113245	0.184157	0.0696916	0.0526684	0.169683	2D	Environmental Information Processing	Signal transduction	Calcium signaling pathway
ko04012 ErbB signaling pathway	0.148821	0.962932	0.00974635	0.0615412	40	0.164297	0.124795	0.306628	0.12606	0.102954	0.248855	2D	Environmental Information Processing	Signal transduction	ErbB signaling pathway
ko04340 Hedgehog signaling pathway	0.180426	0.868489	0.0181488	0.0840968	20	0.299271	0.257233	0.0965046	0.175227	0.253375	0.146754	2D	Environmental Information Processing	Signal transduction	Hedgehog signaling pathway
ko04630 Jak-STAT signaling pathway	0.168201	0.903654	0.0138782	0.0765402	56	0.236861	0.173895	0.173287	0.11544	0.1762	0.252703	2D	Environmental Information Processing	Signal transduction	Jak-STAT signaling pathway
ko04010 MAPK signaling pathway	0.102347	1.20962	0.00157924	0.0177817	110	0.104068	0.0570075	0.13894	0.125218	0.135276	0.145642	2D	Environmental Information Processing	Signal transduction	MAPK signaling pathway
ko04064 NF-kappa B signaling pathway	0.146496	0.956677	0.00993501	0.0615412	64	0.0684016	0.270702	0.19977	0.175902	0.307726	0.0917567	2D	Environmental Information Processing	Signal transduction	NF-kappa B signaling pathway
ko04330 Notch signaling pathway	0.180143	0.825357	0.0234064	0.0990691	21	0.153531	0.347044	0.0941177	0.390544	0.21449	0.142268	2D	Environmental Information Processing	Signal transduction	Notch signaling pathway
ko04151 PI3K-Akt signaling pathway	0.106026	-1.16028	0.00230113	0.0523506	149	0.0330526	0.171512	0.0940391	0.30062	0.216112	0.0629176	Down	Environmental Information Processing	Signal transduction	PI3K-Akt signaling pathway
ko04151 PI3K-Akt signaling pathway	0.183176	0.872668	0.0164321	0.0803046	149	0.262659	0.178879	0.17372	0.230863	0.177336	0.142171	2D	Environmental Information Processing	Signal transduction	PI3K-Akt signaling pathway
ko04370 VEGF signaling pathway	0.0995428	1.21182	0.00175863	0.0177817	28	0.0936638	0.0564387	0.201598	0.159876	0.0566152	0.203221	2D	Environmental Information Processing	Signal transduction	VEGF signaling pathway
ko04310 Wnt signaling pathway	0.166159	0.883306	0.0156947	0.0793455	65	0.167838	0.201707	0.222487	0.114516	0.163384	0.299463	2D	Environmental Information Processing	Signal transduction	Wnt signaling pathway
ko04514 Cell adhesion molecules (CAMs)	0.101434	1.23871	0.00128131	0.016657	64	0.0996901	0.11134	0.181123	0.139412	0.0591564	0.091993	2D	Environmental Information Processing	Signaling molecules and interaction	Cell adhesion molecules (CAMs)
ko04060 Cytokine-cytokine receptor interaction	0.00428826	2.61287	1.25713e-10	1.14399e-08	94	0.00799587	0.00610104	0.00483187	0.00556783	0.0134354	0.000595673	2D	Environmental Information Processing	Signaling molecules and interaction	Cytokine-cytokine receptor interaction
ko04080 Neuroactive ligand-receptor interaction	0.00230691	2.79871	6.10394e-12	1.11092e-09	112	0.00104507	0.00772607	0.000991709	0.00326523	0.00256092	0.00636203	2D	Environmental Information Processing	Signaling molecules and interaction	Neuroactive ligand-receptor interaction
ko03030 DNA replication	0.105236	1.12107	0.00346154	0.045	33	0.212239	0.375753	0.0724904	0.248027	0.0377962	0.0565382	Up	Genetic Information Processing	Replication and repair	DNA replication
ko03020 RNA polymerase	0.0964637	1.27021	0.00110622	0.0223703	27	0.0544643	0.115953	0.0734578	0.192963	0.0994144	0.136799	Up	Genetic Information Processing	Transcription	RNA polymerase
ko03040 Spliceosome	0.120469	0.989116	0.00796893	0.0805748	109	0.114145	0.266266	0.350147	0.498616	0.0683907	0.0139427	Up	Genetic Information Processing	Transcription	Spliceosome
ko03010 Ribosome	0.0167436	1.92101	1.58433e-06	0.000288349	118	0.00565692	0.053503	0.0111174	0.428398	0.00223391	0.0250537	Up	Genetic Information Processing	Translation	Ribosome
ko03008 Ribosome biogenesis in eukaryotes	0.02827	1.73827	1.33854e-05	0.00121807	64	0.0395474	0.121776	0.00977526	0.477507	0.016204	0.00230223	Up	Genetic Information Processing	Translation	Ribosome biogenesis in eukaryotes
ko03013 RNA transport	0.0641873	1.35237	0.000495404	0.0150273	111	0.0393753	0.13444	0.125845	0.538245	0.00542605	0.054227	Up	Genetic Information Processing	Translation	RNA transport
ko00520 Amino sugar and nucleotide sugar metabolism	0.041329	1.67882	2.77732e-05	0.00168491	35	0.058202	0.0342638	0.1422	0.0200655	0.121625	0.0141727	Up	Metabolism	Carbohydrate metabolism	Amino sugar and nucleotide sugar metabolism
ko00051 Fructose and mannose metabolism	0.118716	1.06235	0.00578484	0.0619318	19	0.0882436	0.0532994	0.174923	0.0990123	0.58947	0.110525	Up	Metabolism	Carbohydrate metabolism	Fructose and mannose metabolism
ko00052 Galactose metabolism	0.0716559	1.41908	0.00041795	0.0150273	16	0.138259	0.014664	0.0974201	0.0397068	0.234854	0.126695	Up	Metabolism	Carbohydrate metabolism	Galactose metabolism
ko00534 Glycosaminoglycan biosynthesis - heparan sulfate / heparin	0.140653	1.01651	0.00843836	0.0590685	11	0.148661	0.15673	0.338043	0.0716726	0.150637	0.187372	2D	Metabolism	Glycan biosynthesis and metabolism	Glycosaminoglycan biosynthesis - heparan sulfate / heparin
ko00514 Other types of O-glycan biosynthesis	0.188302	0.83466	0.0227131	0.0984233	16	0.156635	0.186161	0.172445	0.218669	0.234358	0.289677	2D	Metabolism	Glycan biosynthesis and metabolism	Other types of O-glycan biosynthesis
ko01040 Biosynthesis of unsaturated fatty acids	0.0955699	1.29082	0.00109247	0.0223703	15	0.0758974	0.0778229	0.189696	0.0733249	0.148873	0.100261	Up	Metabolism	Lipid metabolism	Biosynthesis of unsaturated fatty acids
ko00120 Primary bile acid biosynthesis	0.140079	1.06558	0.00569805	0.0619318	12	0.187724	0.193899	0.118646	0.188694	0.196181	0.0632317	Up	Metabolism	Lipid metabolism	Primary bile acid biosynthesis
ko00600 Sphingolipid metabolism	0.105647	1.19949	0.00201506	0.0305618	21	0.0528927	0.26888	0.0327061	0.145433	0.18871	0.151674	Up	Metabolism	Lipid metabolism	Sphingolipid metabolism
ko00240 Pyrimidine metabolism	0.112477	1.15117	0.00252414	0.035338	73	0.162341	0.264979	0.0917814	0.152707	0.0577066	0.0923899	Up	Metabolism	Nucleotide metabolism	Pyrimidine metabolism
ko00982 Drug metabolism - cytochrome P450	0.105132	-1.26326	0.00146283	0.0443725	11	0.11781	0.17722	0.0897338	0.112599	0.0348654	0.20971	Down	Metabolism	Xenobiotics biodegradation and metabolism	Drug metabolism - cytochrome P450
ko00982 Drug metabolism - cytochrome P450	0.128519	1.08708	0.00538791	0.039224	11	0.145239	0.130458	0.266455	0.10122	0.234701	0.0745157	2D	Metabolism	Xenobiotics biodegradation and metabolism	Drug metabolism - cytochrome P450
ko04270 Vascular smooth muscle contraction	0.143625	-1.01448	0.00676361	0.0879269	55	0.226445	0.0804619	0.153457	0.108311	0.170754	0.245675	Down	Organismal Systems	Circulatory system	Vascular smooth muscle contraction
ko04270 Vascular smooth muscle contraction	0.101583	1.22145	0.00149217	0.0177817	55	0.0582456	0.135327	0.0863846	0.139818	0.118323	0.164968	2D	Organismal Systems	Circulatory system	Vascular smooth muscle contraction
ko04360 Axon guidance	0.0247896	1.93608	1.44838e-06	8.78683e-05	52	0.027546	0.0196096	0.0486729	0.023399	0.0163887	0.0447615	2D	Organismal Systems	Development	Axon guidance
ko04320 Dorso-ventral axis formation	0.150773	0.993056	0.00957896	0.0615412	11	0.160408	0.134348	0.184238	0.114458	0.154174	0.302314	2D	Organismal Systems	Development	Dorso-ventral axis formation
ko04380 Osteoclast differentiation	0.0832378	1.32133	0.00065295	0.0118837	69	0.0465657	0.08512	0.101977	0.0651227	0.183266	0.127707	2D	Organismal Systems	Development	Osteoclast differentiation
ko04976 Bile secretion	0.0905015	1.26962	0.00105854	0.0223703	39	0.100102	0.0506903	0.0788124	0.0603558	0.258605	0.159556	Up	Organismal Systems	Digestive system	Bile secretion
ko04976 Bile secretion	0.146905	0.957153	0.0101442	0.0615412	39	0.200752	0.256623	0.148879	0.192017	0.107006	0.149607	2D	Organismal Systems	Digestive system	Bile secretion
ko04975 Fat digestion and absorption	0.0596455	1.4504	0.000317872	0.0144632	19	0.105482	0.0689491	0.0804842	0.0579331	0.366982	0.0102096	Up	Organismal Systems	Digestive system	Fat digestion and absorption
ko04970 Salivary secretion	0.0982098	-1.20039	0.00189184	0.0491878	32	0.304161	0.0610891	0.0904668	0.0831954	0.0450732	0.268186	Down	Organismal Systems	Digestive system	Salivary secretion
ko04970 Salivary secretion	0.0818599	1.33914	0.000617625	0.0118837	32	0.0438463	0.167696	0.0948122	0.165088	0.0389222	0.116325	2D	Organismal Systems	Digestive system	Salivary secretion
ko04915 Estrogen signaling pathway	0.178665	0.834503	0.0213484	0.0947661	40	0.178198	0.333419	0.211501	0.0880172	0.118948	0.390894	2D	Organismal Systems	Endocrine system	Estrogen signaling pathway
ko04912 GnRH signaling pathway	0.153642	0.938953	0.0113787	0.0647161	39	0.104036	0.2984	0.130868	0.152547	0.100034	0.358841	2D	Organismal Systems	Endocrine system	GnRH signaling pathway
ko04911 Insulin secretion	0.0787259	1.33694	0.000618991	0.0118837	37	0.0447758	0.251735	0.0732417	0.0838861	0.130812	0.0558077	2D	Organismal Systems	Endocrine system	Insulin secretion
ko04913 Ovarian steroidogenesis	0.0782908	1.36511	0.00054559	0.0118837	22	0.128699	0.105516	0.0855282	0.206483	0.0268367	0.0668701	2D	Organismal Systems	Endocrine system	Ovarian Steroidogenesis
ko04918 Thyroid hormone synthesis	0.127567	1.06001	0.00515855	0.039224	33	0.0926645	0.401855	0.111436	0.116943	0.115489	0.135073	2D	Organismal Systems	Endocrine system	Thyroid hormone synthesis
ko04713 Circadian entrainment	0.131444	-1.03593	0.00595962	0.0834346	45	0.371123	0.0524286	0.0899709	0.226459	0.0584949	0.291279	Down	Organismal Systems	Environmental adaptation	Circadian entrainment
ko04713 Circadian entrainment	0.123097	1.09936	0.00379644	0.0314069	45	0.186265	0.148108	0.242548	0.0599185	0.109606	0.131196	2D	Organismal Systems	Environmental adaptation	Circadian entrainment
ko04662 B cell receptor signaling pathway	0.130941	-1.06507	0.00489958	0.0810657	39	0.195365	0.244447	0.056245	0.157645	0.238646	0.0701978	Down	Organismal Systems	Immune system	B cell receptor signaling pathway
ko04662 B cell receptor signaling pathway	0.17024	0.887042	0.0156305	0.0793455	39	0.109099	0.133667	0.257456	0.193036	0.205965	0.275413	2D	Organismal Systems	Immune system	B cell receptor signaling pathway
ko04062 Chemokine signaling pathway	0.0764045	-1.36789	0.000430665	0.0195953	88	0.146615	0.0722152	0.0210104	0.121366	0.160965	0.0721632	Down	Organismal Systems	Immune system	Chemokine signaling pathway
ko04062 Chemokine signaling pathway	0.0308272	1.80949	5.45681e-06	0.000248285	88	0.0308689	0.0317054	0.0642737	0.0924166	0.0116213	0.026578	2D	Organismal Systems	Immune system	Chemokine signaling pathway
ko04610 Complement and coagulation cascades	0.00734992	-2.42936	2.52613e-09	4.59756e-07	56	0.0126272	0.0151314	0.0145563	0.0228906	0.00165664	0.00257267	Down	Organismal Systems	Immune system	Complement and coagulation cascades
ko04664 Fc epsilon RI signaling pathway	0.0609225	1.49404	0.000166813	0.00506	29	0.0339393	0.0363094	0.092833	0.0838736	0.046734	0.215758	2D	Organismal Systems	Immune system	Fc epsilon RI signaling pathway
ko04640 Hematopoietic cell lineage	0.100262	-1.13415	0.0030637	0.0557593	38	0.0912463	0.149873	0.0975798	0.611085	0.0424222	0.0540151	Down	Organismal Systems	Immune system	Hematopoietic cell lineage
ko04650 Natural killer cell mediated cytotoxicity	0.0387165	-1.73997	1.35163e-05	0.00081999	40	0.0580245	0.0661797	0.0450486	0.0215632	0.0190751	0.0787152	Down	Organismal Systems	Immune system	Natural killer cell mediated cytotoxicity
ko04650 Natural killer cell mediated cytotoxicity	0.103751	1.17685	0.00218682	0.020611	40	0.0645421	0.08725	0.336047	0.145408	0.0320877	0.2193	2D	Organismal Systems	Immune system	Natural killer cell mediated cytotoxicity
ko04622 RIG-I-like receptor signaling pathway	0.174646	0.87564	0.0167669	0.0803046	36	0.124068	0.249477	0.18064	0.119059	0.330922	0.198862	2D	Organismal Systems	Immune system	RIG-I-like receptor signaling pathway
ko04660 T cell receptor signaling pathway	0.0942417	1.20504	0.0017107	0.0177817	61	0.0747758	0.0752276	0.180924	0.108166	0.125596	0.159819	2D	Organismal Systems	Immune system	T cell receptor signaling pathway
ko04620 Toll-like receptor signaling pathway	0.0363004	1.74485	1.24187e-05	0.00045204	48	0.031225	0.0342843	0.0247185	0.0263236	0.117607	0.060124	2D	Organismal Systems	Immune system	Toll-like receptor signaling pathway
ko04725 Cholinergic synapse	0.113695	1.14329	0.00275739	0.0238974	45	0.103587	0.13185	0.266519	0.0810461	0.0861605	0.150843	2D	Organismal Systems	Nervous system	Cholinergic synapse
ko04728 Dopaminergic synapse	0.167767	0.889321	0.015193	0.0793455	54	0.199394	0.126334	0.231646	0.122473	0.19117	0.292611	2D	Organismal Systems	Nervous system	Dopaminergic synapse
ko04724 Glutamatergic synapse	0.0948962	-1.23756	0.00133586	0.0443725	50	0.170763	0.0381737	0.0685858	0.0956998	0.135837	0.229422	Down	Organismal Systems	Nervous system	Glutamatergic synapse
ko04724 Glutamatergic synapse	0.107816	1.16876	0.00226495	0.020611	50	0.0934387	0.200281	0.170982	0.11358	0.0489798	0.163537	2D	Organismal Systems	Nervous system	Glutamatergic synapse
ko04720 Long-term potentiation	0.124316	1.06007	0.00529532	0.039224	28	0.0928335	0.188686	0.368361	0.071035	0.0719545	0.215132	2D	Organismal Systems	Nervous system	Long-term potentiation
ko04723 Retrograde endocannabinoid signaling	0.0919201	1.28247	0.000927615	0.0151664	46	0.0919045	0.0951884	0.131787	0.0701246	0.0792534	0.16294	2D	Organismal Systems	Nervous system	Retrograde endocannabinoid signaling
ko04726 Serotonergic synapse	0.111846	-1.14592	0.00269278	0.054454	49	0.326798	0.0790789	0.0837768	0.143774	0.0613157	0.166157	Down	Organismal Systems	Nervous system	Serotonergic synapse

## Sheet: stress vs control wild
	p.geomean	stat.mean	p.val	q.val	set.size	T.FF.1	T.FF.2	T.FF.3	T.FF.4	T.FF.5	T.FF.6	Direction	Functional group	KEGG Sub-group	Pathway
ko04510 Focal adhesion	0.17062	0.866168	0.0172357	0.0856018	98	0.178019	0.279979	0.287382	0.0913322	0.144035	0.236495	2D	Cellular Processes	Cell communication	Focal adhesion
ko04110 Cell cycle	0.0267188	-1.90457	1.82892e-06	0.000166431	88	0.0228446	0.015268	0.0292143	0.0308654	0.046648	0.0408683	Down	Cellular Processes	Cell growth and death	Cell cycle
ko04111 Cell cycle - yeast	0.0533261	-1.56219	7.63756e-05	0.00231673	54	0.0564738	0.0139156	0.0492593	0.0613553	0.0783818	0.189763	Down	Cellular Processes	Cell growth and death	Cell cycle - yeast
ko04113 Meiosis - yeast	0.0476408	-1.61492	4.88974e-05	0.00177987	41	0.0474286	0.0327141	0.0580778	0.0319367	0.0890329	0.103896	Down	Cellular Processes	Cell growth and death	Meiosis - yeast
ko04020 Calcium signaling pathway	0.144587	1.01807	0.00652417	0.047496	72	0.105008	0.168607	0.170723	0.121899	0.242456	0.146344	2D	Environmental Information Processing	Signal transduction	Calcium signaling pathway
ko04012 ErbB signaling pathway	0.154011	0.970996	0.00915556	0.0541559	40	0.164567	0.156664	0.279467	0.10803	0.103022	0.239205	2D	Environmental Information Processing	Signal transduction	ErbB signaling pathway
ko04390 Hippo signaling pathway	0.142071	0.999746	0.00743927	0.0483553	67	0.241861	0.158694	0.0524048	0.108187	0.127419	0.39425	2D	Environmental Information Processing	Signal transduction	Hippo signaling pathway
ko04391 Hippo signaling pathway - fly	0.182697	0.872115	0.0172176	0.0856018	29	0.181946	0.244691	0.200669	0.153689	0.157956	0.236257	2D	Environmental Information Processing	Signal transduction	Hippo signaling pathway - fly
ko04630 Jak-STAT signaling pathway	0.111466	1.17355	0.00215336	0.0248226	56	0.0773871	0.183433	0.111298	0.128409	0.0675393	0.206239	2D	Environmental Information Processing	Signal transduction	Jak-STAT signaling pathway
ko04010 MAPK signaling pathway	0.0744188	1.35748	0.000467148	0.0125616	110	0.12188	0.14308	0.119991	0.0191488	0.090943	0.0980136	2D	Environmental Information Processing	Signal transduction	MAPK signaling pathway
ko04330 Notch signaling pathway	0.0799173	1.3579	0.000586891	0.0133032	21	0.0996359	0.0823294	0.0455359	0.133974	0.0621846	0.173208	2D	Environmental Information Processing	Signal transduction	Notch signaling pathway
ko04668 TNF signaling pathway	0.134773	1.0251	0.00628952	0.047496	63	0.087368	0.219113	0.0723679	0.206432	0.150238	0.252184	2D	Environmental Information Processing	Signal transduction	TNF signaling pathway
ko04310 Wnt signaling pathway	0.120577	1.06728	0.00471546	0.0408673	65	0.240617	0.284548	0.157839	0.0339929	0.128985	0.130178	2D	Environmental Information Processing	Signal transduction	Wnt signaling pathway
ko04514 Cell adhesion molecules (CAMs)	0.174455	0.8575	0.0183181	0.0877339	64	0.217561	0.25299	0.298221	0.184317	0.128808	0.132905	2D	Environmental Information Processing	Signaling molecules and interaction	Cell adhesion molecules (CAMs)
ko04060 Cytokine-cytokine receptor interaction	0.00500676	2.56394	2.62849e-10	2.39193e-08	94	0.00860249	0.00566342	0.0061368	0.00253672	0.00383226	0.00999346	2D	Environmental Information Processing	Signaling molecules and interaction	Cytokine-cytokine receptor interaction
ko04080 Neuroactive ligand-receptor interaction	0.00191367	2.85858	2.25169e-12	4.09808e-10	112	0.000991341	0.00117809	0.00133445	0.00115896	0.015937	0.00437342	2D	Environmental Information Processing	Signaling molecules and interaction	Neuroactive ligand-receptor interaction
ko03050 Proteasome	0.0877815	-1.19131	0.00207094	0.0324423	40	0.131174	0.162914	0.0554074	0.0411151	0.442627	0.0745251	Down	Genetic Information Processing	Folding, sorting and degradation	Proteasome
ko03410 Base excision repair	0.0596412	-1.54553	0.000101442	0.00263748	28	0.0176704	0.0948136	0.0346717	0.124613	0.123703	0.0594228	Down	Genetic Information Processing	Replication and repair	Base excision repair
ko03030 DNA replication	0.00214015	-2.91331	4.63224e-12	8.43067e-10	33	0.000320933	0.0204167	0.00345395	0.000483595	0.00333811	0.00574967	Down	Genetic Information Processing	Replication and repair	DNA replication
ko03460 Fanconi anemia pathway	0.113619	-1.12259	0.00331737	0.0464431	35	0.0716072	0.0354183	0.223809	0.110651	0.159305	0.344853	Down	Genetic Information Processing	Replication and repair	Fanconi anemia pathway
ko03440 Homologous recombination	0.0477199	-1.66288	4.03061e-05	0.00177987	20	0.0368621	0.062853	0.0920714	0.0328271	0.0134515	0.16956	Down	Genetic Information Processing	Replication and repair	Homologous recombination
ko03430 Mismatch repair	0.0322424	-1.86347	6.37513e-06	0.000386758	18	0.0038602	0.0599168	0.0274374	0.0337112	0.0610408	0.11978	Down	Genetic Information Processing	Replication and repair	Mismatch repair
ko03420 Nucleotide excision repair	0.0862692	-1.30294	0.000825814	0.0150298	35	0.0465416	0.229288	0.0600863	0.0714426	0.0801229	0.193884	Down	Genetic Information Processing	Replication and repair	Nucleotide excision repair
ko03040 Spliceosome	0.0538337	-1.39642	0.000341951	0.00691502	109	0.147806	0.197985	0.113217	0.0757565	0.0745393	0.009719	Down	Genetic Information Processing	Transcription	Spliceosome
ko03008 Ribosome biogenesis in eukaryotes	0.0431408	-1.5103	0.000129837	0.00295378	64	0.0511016	0.12766	0.0358081	0.0609801	0.207916	0.0220457	Down	Genetic Information Processing	Translation	Ribosome biogenesis in eukaryotes
ko00010 Glycolysis / Gluconeogenesis	0.0581909	1.52269	0.00012876	0.0170325	30	0.0165186	0.0306451	0.0633623	0.187836	0.116762	0.0893674	Up	Metabolism	Carbohydrate metabolism	Glycolysis / Gluconeogenesis
ko00190 Oxidative phosphorylation	0.0625743	1.32421	0.000645296	0.0353287	105	0.00921959	0.399503	0.0460775	0.349938	0.0211086	0.12094	Up	Metabolism	Energy metabolism	Oxidative phosphorylation
ko00601 Glycosphingolipid biosynthesis - lacto and neolacto series	0.167214	0.858583	0.0208191	0.0924166	14	0.285651	0.350335	0.117971	0.0908815	0.250354	0.198935	2D	Metabolism	Glycan biosynthesis and metabolism	Glycosphingolipid biosynthesis - lacto and neolacto series
ko00071 Fatty acid degradation	0.0923322	1.25435	0.0013697	0.0400345	24	0.270498	0.102608	0.0864844	0.107459	0.0827166	0.0708413	Up	Metabolism	Lipid metabolism	Fatty acid degradation
ko00760 Nicotinate and nicotinamide metabolism	0.123805	1.12018	0.00423695	0.0642604	12	0.214261	0.207279	0.222542	0.110181	0.0634127	0.0925991	Up	Metabolism	Metabolism of cofactors and vitamins	Nicotinate and nicotinamide metabolism
ko00240 Pyrimidine metabolism	0.103187	-1.17367	0.00213905	0.0324423	73	0.197061	0.17429	0.134278	0.0527217	0.146195	0.0763424	Down	Metabolism	Nucleotide metabolism	Pyrimidine metabolism
ko04260 Cardiac muscle contraction	0.105293	1.14805	0.00274829	0.0500189	41	0.0931343	0.322632	0.187501	0.166426	0.0247818	0.115175	Up	Organismal Systems	Circulatory system	Cardiac muscle contraction
ko04270 Vascular smooth muscle contraction	0.108026	1.19872	0.00177505	0.0248226	55	0.191637	0.0697759	0.123035	0.104719	0.110455	0.124412	2D	Organismal Systems	Circulatory system	Vascular smooth muscle contraction
ko04360 Axon guidance	0.0322442	1.82912	4.79248e-06	0.000290744	52	0.0363525	0.0982688	0.0463544	0.0291303	0.0276866	0.0117518	2D	Organismal Systems	Development	Axon guidance
ko04320 Dorso-ventral axis formation	0.154628	0.962196	0.0115314	0.0635976	11	0.172979	0.224707	0.136659	0.214601	0.126025	0.20159	2D	Organismal Systems	Development	Dorso-ventral axis formation
ko04380 Osteoclast differentiation	0.0715992	1.35835	0.000483139	0.0125616	69	0.0291489	0.133772	0.0758301	0.128771	0.0643112	0.159609	2D	Organismal Systems	Development	Osteoclast differentiation
ko04973 Carbohydrate digestion and absorption	0.0902421	1.25564	0.00153979	0.0400345	15	0.023324	0.173987	0.173762	0.120116	0.249853	0.0626454	Up	Organismal Systems	Digestive system	Carbohydrate digestion and absorption
ko04975 Fat digestion and absorption	0.072188	1.33884	0.000776455	0.0353287	19	0.0954719	0.099186	0.0149595	0.447985	0.201631	0.0216937	Up	Organismal Systems	Digestive system	Fat digestion and absorption
ko04971 Gastric acid secretion	0.162397	0.926236	0.0125445	0.06715	27	0.177615	0.185946	0.159401	0.114561	0.274539	0.191929	2D	Organismal Systems	Digestive system	Gastric acid secretion
ko04978 Mineral absorption	0.105759	1.10727	0.00404408	0.0642604	25	0.191135	0.195224	0.140786	0.0781027	0.232406	0.0631406	Up	Organismal Systems	Digestive system	Mineral absorption
ko04974 Protein digestion and absorption	0.0646962	1.26198	0.00124708	0.0400345	40	0.0206443	0.0742544	0.013207	0.323029	0.236327	0.299981	Up	Organismal Systems	Digestive system	Protein digestion and absorption
ko04970 Salivary secretion	0.106119	1.19901	0.00187255	0.0248226	32	0.1252	0.0475964	0.102058	0.186093	0.151966	0.137324	2D	Organismal Systems	Digestive system	Salivary secretion
ko04977 Vitamin digestion and absorption	0.141084	1.01414	0.00762953	0.0991839	17	0.284083	0.101822	0.162064	0.353592	0.0555383	0.125926	Up	Organismal Systems	Digestive system	Vitamin digestion and absorption
ko04920 Adipocytokine signaling pathway	0.0892642	1.20126	0.00191554	0.0435785	35	0.0114965	0.0723693	0.103991	0.164516	0.356379	0.227223	Up	Organismal Systems	Endocrine system	Adipocytokine signaling pathway
ko04920 Adipocytokine signaling pathway	0.106115	1.14597	0.00282107	0.030202	35	0.040064	0.147671	0.0448367	0.227534	0.16824	0.281555	2D	Organismal Systems	Endocrine system	Adipocytokine signaling pathway
ko04915 Estrogen signaling pathway	0.112275	1.17484	0.0021822	0.0248226	40	0.135286	0.0650908	0.113205	0.073443	0.182631	0.211393	2D	Organismal Systems	Endocrine system	Estrogen signaling pathway
ko04911 Insulin secretion	0.0983109	1.23862	0.00135631	0.0246849	37	0.259723	0.0827171	0.193946	0.0504029	0.0905464	0.0705238	2D	Organismal Systems	Endocrine system	Insulin secretion
ko04916 Melanogenesis	0.179351	0.8557	0.0188647	0.0880353	38	0.260493	0.192759	0.121656	0.152783	0.187706	0.307761	2D	Organismal Systems	Endocrine system	Melanogenesis
ko04913 Ovarian steroidogenesis	0.165803	0.877043	0.0174026	0.0856018	22	0.529545	0.10814	0.166328	0.174718	0.101495	0.203257	2D	Organismal Systems	Endocrine system	Ovarian Steroidogenesis
ko03320 PPAR signaling pathway	0.0611579	1.47242	0.00018717	0.0170325	42	0.0364121	0.101087	0.0392809	0.208011	0.090174	0.0415715	Up	Organismal Systems	Endocrine system	PPAR signaling pathway
ko04917 Prolactin signaling pathway	0.187207	0.826268	0.0223389	0.0968018	39	0.204713	0.231141	0.230484	0.330478	0.132615	0.142802	2D	Organismal Systems	Endocrine system	Prolactin signaling pathway
ko04614 Renin-angiotensin system	0.117493	1.19143	0.00265982	0.0500189	10	0.164759	0.177156	0.123424	0.131563	0.126642	0.0660417	Up	Organismal Systems	Endocrine system	Renin-angiotensin system
ko04918 Thyroid hormone synthesis	0.142968	1.01532	0.00694814	0.0483553	33	0.19566	0.152395	0.0691913	0.227676	0.170831	0.167801	2D	Organismal Systems	Endocrine system	Thyroid hormone synthesis
ko04713 Circadian entrainment	0.123199	1.11996	0.00325019	0.0328631	45	0.139088	0.127264	0.107212	0.0994295	0.191532	0.148322	2D	Organismal Systems	Environmental adaptation	Circadian entrainment
ko04961 Endocrine and other factor-regulated calcium reabsorption	0.179599	0.85754	0.0194388	0.0884466	20	0.278427	0.128487	0.235304	0.215676	0.162596	0.198758	2D	Organismal Systems	Excretory system	Endocrine and other factor-regulated calcium reabsorption
ko04964 Proximal tubule bicarbonate reclamation	0.123105	1.10231	0.00500704	0.0700985	11	0.193734	0.237541	0.246049	0.0568687	0.126846	0.0934502	Up	Organismal Systems	Excretory system	Proximal tubule bicarbonate reclamation
ko04662 B cell receptor signaling pathway	0.12305	1.09601	0.00394044	0.035858	39	0.0761247	0.108273	0.15097	0.137744	0.127885	0.28029	2D	Organismal Systems	Immune system	B cell receptor signaling pathway
ko04062 Chemokine signaling pathway	0.108668	1.18596	0.00191138	0.0248226	88	0.110832	0.0532745	0.225724	0.140432	0.122956	0.104333	2D	Organismal Systems	Immune system	Chemokine signaling pathway
ko04640 Hematopoietic cell lineage	0.121234	1.05285	0.00544751	0.0450658	38	0.0600025	0.241161	0.163285	0.18688	0.245532	0.0777922	2D	Organismal Systems	Immune system	Hematopoietic cell lineage
ko04650 Natural killer cell mediated cytotoxicity	0.109452	1.03456	0.00622977	0.047496	40	0.0348357	0.109077	0.184871	0.0914213	0.253078	0.427957	2D	Organismal Systems	Immune system	Natural killer cell mediated cytotoxicity
ko04621 NOD-like receptor signaling pathway	0.13769	1.0088	0.00735795	0.0483553	31	0.0930752	0.156786	0.0782946	0.144536	0.169967	0.415222	2D	Organismal Systems	Immune system	NOD-like receptor signaling pathway
ko04622 RIG-I-like receptor signaling pathway	0.106355	1.18983	0.00199112	0.0248226	36	0.0713316	0.0800387	0.0974152	0.211665	0.135357	0.162506	2D	Organismal Systems	Immune system	RIG-I-like receptor signaling pathway
ko04660 T cell receptor signaling pathway	0.0452298	1.58971	5.84435e-05	0.00265918	61	0.0203602	0.0323178	0.0633567	0.0615185	0.046615	0.213382	2D	Organismal Systems	Immune system	T cell receptor signaling pathway
ko04620 Toll-like receptor signaling pathway	0.0650133	1.44374	0.000235304	0.00856507	48	0.0188748	0.0457222	0.0805113	0.0924977	0.102947	0.209474	2D	Organismal Systems	Immune system	Toll-like receptor signaling pathway
ko04725 Cholinergic synapse	0.116535	1.11379	0.00344674	0.0330162	45	0.27045	0.123833	0.144297	0.0556636	0.169871	0.106978	2D	Organismal Systems	Nervous system	Cholinergic synapse
ko04728 Dopaminergic synapse	0.147014	0.968951	0.00922436	0.0541559	54	0.168781	0.384002	0.0905558	0.0458574	0.244087	0.211497	2D	Organismal Systems	Nervous system	Dopaminergic synapse
ko04724 Glutamatergic synapse	0.0863152	1.32306	0.00065785	0.0133032	50	0.142017	0.0695624	0.0707518	0.056975	0.161725	0.100199	2D	Organismal Systems	Nervous system	Glutamatergic synapse
ko04720 Long-term potentiation	0.157924	0.965166	0.00972104	0.0552884	28	0.176771	0.168205	0.112848	0.102767	0.234214	0.263434	2D	Organismal Systems	Nervous system	Long-term potentiation
ko04723 Retrograde endocannabinoid signaling	0.148288	0.981482	0.00853234	0.0535478	46	0.218458	0.175041	0.163072	0.078609	0.23121	0.158731	2D	Organismal Systems	Nervous system	Retrograde endocannabinoid signaling

## Sheet: stress vs control domesticated
	p.geomean	stat.mean	p.val	q.val	set.size	T.MM.1	T.MM.2	T.MM.3	T.MM.4	T.MM.5	T.MM.6	Direction	Functional group	KEGG Sub-group	Pathway
ko00190 Oxidative phosphorylation	0.046158	1.44863	0.000218213	0.0321193	105	0.0489702	0.299902	0.00251897	0.476219	0.00701168	0.132557	Up	Metabolism	Energy metabolism	Oxidative phosphorylation
ko04080 Neuroactive ligand-receptor interaction	0.040026	1.39579	0.000352959	0.0321193	112	0.348727	0.062837	0.0195556	0.0271191	0.00681708	0.530992	Up	Environmental Information Processing	Signaling molecules and interaction	Neuroactive ligand-receptor interaction
ko04975 Fat digestion and absorption	0.0666643	1.28195	0.00154483	0.09372	19	0.130127	0.1112	0.136629	0.0618996	0.564016	0.00759478	Up	Organismal Systems	Digestive system	Fat digestion and absorption
ko03030 DNA replication	0.00817568	-2.40788	5.59478e-09	1.01825e-06	33	0.00480341	0.00116887	0.0172146	0.0076171	0.0714852	0.00936802	Down	Genetic Information Processing	Replication and repair	DNA replication
ko04110 Cell cycle	0.0393648	-1.69537	1.87126e-05	0.00170285	88	0.00927341	0.168936	0.0282138	0.0726882	0.0669329	0.0272327	Down	Cellular Processes	Cell growth and death	Cell cycle
ko04113 Meiosis - yeast	0.0597511	-1.48286	0.000171481	0.00911575	41	0.0165137	0.101602	0.059948	0.0215429	0.134532	0.24736	Down	Cellular Processes	Cell growth and death	Meiosis - yeast
ko04111 Cell cycle - yeast	0.0605803	-1.46179	0.000200346	0.00911575	54	0.0078399	0.183963	0.0645359	0.038571	0.189981	0.116949	Down	Cellular Processes	Cell growth and death	Cell cycle - yeast
ko03050 Proteasome	0.0641434	-1.393	0.000401716	0.0146225	40	0.101698	0.0228526	0.0372505	0.0373562	0.252577	0.239615	Down	Genetic Information Processing	Folding, sorting and degradation	Proteasome
ko00230 Purine metabolism	0.0989489	-1.23372	0.00130636	0.0396263	104	0.0896316	0.0853426	0.0844428	0.169203	0.107082	0.13906	Down	Metabolism	Nucleotide metabolism	Purine metabolism
ko03410 Base excision repair	0.101738	-1.20885	0.00179306	0.0466195	28	0.173332	0.0338831	0.110763	0.116743	0.299223	0.0769601	Down	Genetic Information Processing	Replication and repair	Base excision repair
ko03040 Spliceosome	0.0765765	-1.16478	0.0023027	0.0523864	109	0.105469	0.0518014	0.0347328	0.0204984	0.412256	0.507539	Down	Genetic Information Processing	Transcription	Spliceosome
ko00240 Pyrimidine metabolism	0.114562	-1.13042	0.00295291	0.0597143	73	0.0935211	0.0769444	0.113548	0.150794	0.292012	0.11321	Down	Metabolism	Nucleotide metabolism	Pyrimidine metabolism
ko03430 Mismatch repair	0.12741	-1.09069	0.00453123	0.0824684	18	0.0444434	0.161988	0.0690081	0.189804	0.341124	0.175269	Down	Genetic Information Processing	Replication and repair	Mismatch repair
ko03440 Homologous recombination	0.131152	-1.07104	0.00509483	0.0842962	20	0.108376	0.0896568	0.265124	0.121214	0.368458	0.0567166	Down	Genetic Information Processing	Replication and repair	Homologous recombination
ko03008 Ribosome biogenesis in eukaryotes	0.0962915	-1.03797	0.00593185	0.0899664	64	0.0554671	0.0681005	0.248177	0.0120385	0.431227	0.512024	Down	Genetic Information Processing	Translation	Ribosome biogenesis in eukaryotes
ko04080 Neuroactive ligand-receptor interaction	0.000637664	3.21062	4.39545e-15	7.99971e-13	112	0.00205431	0.00168153	0.000138987	0.000724465	0.000149532	0.00289588	2D	Environmental Information Processing	Signaling molecules and interaction	Neuroactive ligand-receptor interaction
ko04060 Cytokine-cytokine receptor interaction	0.0126224	2.18781	5.49729e-08	5.00253e-06	94	0.0290428	0.0226717	0.0267095	0.00906731	0.0147712	0.00416449	2D	Environmental Information Processing	Signaling molecules and interaction	Cytokine-cytokine receptor interaction
ko04360 Axon guidance	0.0328758	1.8004	6.66625e-06	0.000404419	52	0.0536572	0.0288276	0.0407072	0.0131946	0.0272749	0.10162	2D	Organismal Systems	Development	Axon guidance
ko04911 Insulin secretion	0.0457568	1.64132	3.84208e-05	0.00174815	37	0.0744546	0.0843124	0.0535924	0.0450788	0.0126399	0.0929656	2D	Organismal Systems	Endocrine system	Insulin secretion
ko04913 Ovarian steroidogenesis	0.0649234	1.50516	0.00015701	0.00504442	22	0.117226	0.0562687	0.0942666	0.10745	0.0371911	0.0435068	2D	Organismal Systems	Endocrine system	Ovarian Steroidogenesis
ko04724 Glutamatergic synapse	0.0615037	1.48094	0.0001663	0.00504442	50	0.10739	0.100434	0.0365202	0.0774593	0.0330409	0.111699	2D	Organismal Systems	Nervous system	Glutamatergic synapse
ko04723 Retrograde endocannabinoid signaling	0.0632138	1.46303	0.000199274	0.00518112	46	0.131537	0.0978449	0.0659597	0.0731974	0.013581	0.137301	2D	Organismal Systems	Nervous system	Retrograde endocannabinoid signaling
ko04270 Vascular smooth muscle contraction	0.0691747	1.43728	0.000242541	0.00551781	55	0.0865405	0.0959938	0.0243842	0.114156	0.0642408	0.118327	2D	Organismal Systems	Circulatory system	Vascular smooth muscle contraction
ko04380 Osteoclast differentiation	0.0725682	1.38746	0.000371333	0.00750919	69	0.0569173	0.106667	0.0434387	0.11282	0.159948	0.0644015	2D	Organismal Systems	Development	Osteoclast differentiation
ko04010 MAPK signaling pathway	0.0759839	1.35771	0.000465542	0.00806647	110	0.163134	0.0752405	0.113707	0.053214	0.101219	0.0555178	2D	Environmental Information Processing	Signal transduction	MAPK signaling pathway
ko04970 Salivary secretion	0.0721139	1.37284	0.000487534	0.00806647	32	0.0923627	0.113613	0.193569	0.103445	0.00634885	0.177615	2D	Organismal Systems	Digestive system	Salivary secretion
ko04915 Estrogen signaling pathway	0.0813517	1.30122	0.000835037	0.0126647	40	0.121227	0.226508	0.0213101	0.0976854	0.0484788	0.212331	2D	Organismal Systems	Endocrine system	Estrogen signaling pathway
ko04620 Toll-like receptor signaling pathway	0.0876649	1.28083	0.000948221	0.0132751	48	0.0965454	0.109301	0.0602397	0.20261	0.171978	0.0405039	2D	Organismal Systems	Immune system	Toll-like receptor signaling pathway
ko04713 Circadian entrainment	0.0976373	1.24103	0.00130164	0.0169213	45	0.157343	0.119886	0.105988	0.11582	0.036665	0.168646	2D	Organismal Systems	Environmental adaptation	Circadian entrainment
ko04725 Cholinergic synapse	0.0998583	1.22116	0.00152834	0.0185438	45	0.159075	0.12259	0.0962936	0.109466	0.049984	0.179417	2D	Organismal Systems	Nervous system	Cholinergic synapse
ko04918 Thyroid hormone synthesis	0.101806	1.21675	0.00163249	0.0185695	33	0.0509486	0.177417	0.094701	0.1862	0.111038	0.111397	2D	Organismal Systems	Endocrine system	Thyroid hormone synthesis
ko04720 Long-term potentiation	0.109622	1.19396	0.00196916	0.0210816	28	0.121106	0.22752	0.118822	0.0798835	0.0526052	0.173954	2D	Organismal Systems	Nervous system	Long-term potentiation
ko04310 Wnt signaling pathway	0.10323	1.17078	0.00219888	0.0222331	65	0.143233	0.19198	0.173097	0.0854476	0.0510717	0.136967	2D	Environmental Information Processing	Signal transduction	Wnt signaling pathway
ko04020 Calcium signaling pathway	0.113477	1.15375	0.0024674	0.0236351	72	0.103582	0.110012	0.244756	0.113373	0.0585465	0.175843	2D	Environmental Information Processing	Signal transduction	Calcium signaling pathway
ko04390 Hippo signaling pathway	0.114644	1.13456	0.00286926	0.0261103	67	0.246161	0.301162	0.143197	0.0751554	0.082255	0.0480435	2D	Environmental Information Processing	Signal transduction	Hippo signaling pathway
ko04728 Dopaminergic synapse	0.116589	1.12575	0.0031031	0.0268935	54	0.176991	0.149867	0.127088	0.18424	0.0492315	0.147401	2D	Organismal Systems	Nervous system	Dopaminergic synapse
ko04320 Dorso-ventral axis formation	0.12106	1.13078	0.00394602	0.0326443	11	0.201989	0.104024	0.120537	0.137347	0.0693651	0.25181	2D	Organismal Systems	Development	Dorso-ventral axis formation
ko04912 GnRH signaling pathway	0.12802	1.07451	0.00458339	0.0341576	39	0.195184	0.178048	0.0703136	0.238288	0.0486966	0.224188	2D	Organismal Systems	Endocrine system	GnRH signaling pathway
ko04062 Chemokine signaling pathway	0.118163	1.06678	0.00467038	0.0341576	88	0.172293	0.200357	0.105947	0.335735	0.0276897	0.160322	2D	Organismal Systems	Immune system	Chemokine signaling pathway
ko04330 Notch signaling pathway	0.121919	1.08448	0.00469198	0.0341576	21	0.123293	0.190093	0.0795312	0.227068	0.136462	0.141461	2D	Environmental Information Processing	Signal transduction	Notch signaling pathway
ko04012 ErbB signaling pathway	0.133318	1.04711	0.00552688	0.0380734	40	0.125877	0.322448	0.11805	0.0939963	0.0919878	0.215573	2D	Environmental Information Processing	Signal transduction	ErbB signaling pathway
ko04660 T cell receptor signaling pathway	0.133378	1.04076	0.00564826	0.0380734	61	0.0907405	0.315429	0.137277	0.184608	0.170103	0.0743065	2D	Organismal Systems	Immune system	T cell receptor signaling pathway
ko04726 Serotonergic synapse	0.143871	1.00835	0.00710014	0.043378	49	0.300838	0.171518	0.122799	0.137461	0.0512445	0.25767	2D	Organismal Systems	Nervous system	Serotonergic synapse
ko04540 Gap junction	0.144736	1.00624	0.00729323	0.043378	39	0.183096	0.162133	0.111646	0.245371	0.0828935	0.211661	2D	Cellular Processes	Cell communication	Gap junction
ko04621 NOD-like receptor signaling pathway	0.137054	1.01006	0.00731657	0.043378	31	0.116249	0.20427	0.0368699	0.288733	0.201403	0.218382	2D	Organismal Systems	Immune system	NOD-like receptor signaling pathway
ko00534 Glycosaminoglycan biosynthesis - heparan sulfate / heparin	0.138881	1.03705	0.00738856	0.043378	11	0.224827	0.197368	0.336967	0.0439956	0.154619	0.111112	2D	Metabolism	Glycan biosynthesis and metabolism	Glycosaminoglycan biosynthesis - heparan sulfate / heparin
ko04630 Jak-STAT signaling pathway	0.151883	0.9621	0.00958919	0.0545385	56	0.174052	0.339804	0.202183	0.159934	0.128479	0.0773167	2D	Environmental Information Processing	Signal transduction	Jak-STAT signaling pathway
ko04064 NF-kappa B signaling pathway	0.150864	0.940332	0.011034	0.060854	64	0.14484	0.337093	0.112241	0.231863	0.237237	0.0713939	2D	Environmental Information Processing	Signal transduction	NF-kappa B signaling pathway
ko04971 Gastric acid secretion	0.15412	0.932721	0.0122146	0.0653842	27	0.24477	0.404514	0.191525	0.120266	0.0390401	0.220202	2D	Organismal Systems	Digestive system	Gastric acid secretion
ko04144 Endocytosis	0.142982	0.912415	0.0130512	0.0661142	105	0.333122	0.171684	0.209035	0.128287	0.16742	0.122661	2D	Cellular Processes	Transport and catabolism	Endocytosis
ko04662 B cell receptor signaling pathway	0.169016	0.91495	0.0130775	0.0661142	39	0.139623	0.173702	0.158127	0.253898	0.216892	0.163893	2D	Organismal Systems	Immune system	B cell receptor signaling pathway
ko00533 Glycosaminoglycan biosynthesis - keratan sulfate	0.16441	0.929615	0.0142425	0.0700577	11	0.230626	0.246098	0.177545	0.0707798	0.182679	0.260395	2D	Metabolism	Glycan biosynthesis and metabolism	Glycosaminoglycan biosynthesis - keratan sulfate
ko04917 Prolactin signaling pathway	0.169524	0.887763	0.0155673	0.0727215	39	0.195065	0.265325	0.169526	0.250804	0.0656828	0.255793	2D	Organismal Systems	Endocrine system	Prolactin signaling pathway
ko04391 Hippo signaling pathway - fly	0.165929	0.890721	0.0155832	0.0727215	29	0.112538	0.296374	0.261213	0.195424	0.146101	0.163662	2D	Environmental Information Processing	Signal transduction	Hippo signaling pathway - fly
ko04920 Adipocytokine signaling pathway	0.16646	0.874567	0.0169841	0.0763614	35	0.166098	0.163935	0.226109	0.177884	0.233879	0.199171	2D	Organismal Systems	Endocrine system	Adipocytokine signaling pathway
ko04664 Fc epsilon RI signaling pathway	0.173586	0.871108	0.0175065	0.0763614	29	0.14774	0.158016	0.22969	0.328094	0.180461	0.154682	2D	Organismal Systems	Immune system	Fc epsilon RI signaling pathway
ko04510 Focal adhesion	0.178274	0.862349	0.0176219	0.0763614	98	0.120619	0.199054	0.241653	0.223475	0.150597	0.259388	2D	Cellular Processes	Cell communication	Focal adhesion
ko04710 Circadian rhythm	0.176326	0.847527	0.0208498	0.088248	19	0.262196	0.143742	0.231638	0.105912	0.454978	0.116429	2D	Organismal Systems	Environmental adaptation	Circadian rhythm

## Sheet: stress vs control WD
	p.geomean	stat.mean	p.val	q.val	set.size	T.FM.1	T.FM.2	T.FM.3	T.FM.4	T.FM.5	T.FM.6	Direction	Functional group	KEGG Sub-group	Pathway
ko04510 Focal adhesion	0.126729	1.07628	0.00431916	0.0327536	98	0.232233	0.107595	0.14109	0.0388493	0.258363	0.165152	2D	Cellular Processes	Cell communication	Focal adhesion
ko04540 Gap junction	0.116122	1.17111	0.00223953	0.0249548	39	0.115045	0.150184	0.139257	0.113125	0.117537	0.106518	2D	Cellular Processes	Cell communication	Gap junction
ko04110 Cell cycle	0.00598714	-2.46813	1.17182e-09	1.06636e-07	88	0.00503774	0.0098202	0.0238422	0.0157057	0.000268222	0.0166636	Down	Cellular Processes	Cell growth and death	Cell cycle
ko04111 Cell cycle - yeast	0.0395317	-1.74127	1.22193e-05	0.000444783	54	0.0388391	0.0343424	0.0446418	0.0865882	0.0165044	0.0595435	Down	Cellular Processes	Cell growth and death	Cell cycle - yeast
ko04113 Meiosis - yeast	0.0536765	-1.57159	7.28348e-05	0.00175368	41	0.0476631	0.0356223	0.0864404	0.149328	0.0241165	0.0729046	Down	Cellular Processes	Cell growth and death	Meiosis - yeast
ko04020 Calcium signaling pathway	0.171391	0.904231	0.0136962	0.0686604	72	0.15525	0.122853	0.275663	0.150896	0.16999	0.259242	2D	Environmental Information Processing	Signal transduction	Calcium signaling pathway
ko04012 ErbB signaling pathway	0.0809345	1.3549	0.00051779	0.00847272	40	0.105071	0.0468045	0.0797392	0.248701	0.0386442	0.104903	2D	Environmental Information Processing	Signal transduction	ErbB signaling pathway
ko04390 Hippo signaling pathway	0.163841	0.879242	0.016091	0.0738739	67	0.121422	0.0913138	0.308604	0.214139	0.174995	0.301539	2D	Environmental Information Processing	Signal transduction	Hippo signaling pathway
ko04630 Jak-STAT signaling pathway	0.0996892	1.22623	0.00143624	0.0201073	56	0.0958069	0.0822797	0.0686499	0.221255	0.127531	0.112308	2D	Environmental Information Processing	Signal transduction	Jak-STAT signaling pathway
ko04010 MAPK signaling pathway	0.0483438	1.60946	4.38842e-05	0.00199673	110	0.0183136	0.0552329	0.07136	0.114851	0.0322614	0.0798898	2D	Environmental Information Processing	Signal transduction	MAPK signaling pathway
ko04064 NF-kappa B signaling pathway	0.173652	0.859701	0.0181089	0.076647	64	0.300782	0.249684	0.239938	0.280139	0.119028	0.0716025	2D	Environmental Information Processing	Signal transduction	NF-kappa B signaling pathway
ko04330 Notch signaling pathway	0.180728	0.858684	0.0192021	0.0791691	21	0.21423	0.229326	0.215174	0.250194	0.182037	0.121262	2D	Environmental Information Processing	Signal transduction	Notch signaling pathway
ko04151 PI3K-Akt signaling pathway	0.118743	1.12099	0.00308281	0.0272542	149	0.205833	0.0680755	0.108366	0.144561	0.126949	0.168208	2D	Environmental Information Processing	Signal transduction	PI3K-Akt signaling pathway
ko04668 TNF signaling pathway	0.158647	0.915203	0.012917	0.0686604	63	0.175093	0.283019	0.233708	0.208117	0.226165	0.0484728	2D	Environmental Information Processing	Signal transduction	TNF signaling pathway
ko04370 VEGF signaling pathway	0.14782	1.02907	0.00633672	0.0427142	28	0.149815	0.08931	0.145944	0.200089	0.177199	0.183396	2D	Environmental Information Processing	Signal transduction	VEGF signaling pathway
ko04310 Wnt signaling pathway	0.135679	1.00017	0.00745838	0.0468078	65	0.130766	0.149503	0.0789552	0.325501	0.222452	0.12035	2D	Environmental Information Processing	Signal transduction	Wnt signaling pathway
ko04060 Cytokine-cytokine receptor interaction	0.00590591	2.48061	9.35115e-10	8.50955e-08	94	0.00517268	0.00209622	0.027892	0.0043186	0.00828836	0.00923423	2D	Environmental Information Processing	Signaling molecules and interaction	Cytokine-cytokine receptor interaction
ko04080 Neuroactive ligand-receptor interaction	0.000761007	3.17515	8.21712e-15	1.49552e-12	112	0.000863812	0.000711413	0.00137672	0.000520557	0.000650501	0.0013971	2D	Environmental Information Processing	Signaling molecules and interaction	Neuroactive ligand-receptor interaction
ko03050 Proteasome	0.0454952	-1.56682	8.67203e-05	0.00175368	40	0.0246618	0.00245752	0.0543385	0.133935	0.157608	0.241133	Down	Genetic Information Processing	Folding, sorting and degradation	Proteasome
ko03410 Base excision repair	0.116913	-1.15219	0.0026914	0.0408195	28	0.102565	0.0882009	0.135644	0.163233	0.124463	0.167504	Down	Genetic Information Processing	Replication and repair	Base excision repair
ko03030 DNA replication	0.00138127	-3.0843	2.41115e-13	4.38829e-11	33	0.000372135	0.000602543	0.000834176	0.00643541	0.00100244	0.00866999	Down	Genetic Information Processing	Replication and repair	DNA replication
ko03030 DNA replication	0.0841476	1.19292	0.00210816	0.0249548	33	0.0307098	0.0157469	0.175801	0.539915	0.0399773	0.342453	2D	Genetic Information Processing	Replication and repair	DNA replication
ko03440 Homologous recombination	0.129178	-1.07473	0.005	0.07	20	0.122754	0.0276135	0.246094	0.188669	0.124831	0.304944	Down	Genetic Information Processing	Replication and repair	Homologous recombination
ko03430 Mismatch repair	0.0188369	-2.14112	2.733e-07	1.65802e-05	18	0.00972723	0.0148186	0.0259204	0.0213568	0.0131173	0.0588303	Down	Genetic Information Processing	Replication and repair	Mismatch repair
ko03420 Nucleotide excision repair	0.0696921	-1.45946	0.000210416	0.00382957	35	0.0609981	0.0560487	0.0413215	0.0724404	0.147394	0.103446	Down	Genetic Information Processing	Replication and repair	Nucleotide excision repair
ko03040 Spliceosome	0.0326993	-1.56123	7.57461e-05	0.00175368	109	0.00518855	0.00807876	0.342631	0.3225	0.00453696	0.201422	Down	Genetic Information Processing	Transcription	Spliceosome
ko03008 Ribosome biogenesis in eukaryotes	0.0222927	-1.93922	1.37384e-06	6.25097e-05	64	0.00998101	0.00387802	0.0484777	0.106059	0.00881641	0.112206	Down	Genetic Information Processing	Translation	Ribosome biogenesis in eukaryotes
ko03013 RNA transport	0.0981193	-1.03317	0.00594265	0.0772544	111	0.0387711	0.00747552	0.101501	0.503497	0.129	0.667249	Down	Genetic Information Processing	Translation	RNA transport
ko00020 Citrate cycle (TCA cycle)	0.12865	1.11187	0.0037301	0.075431	22	0.194672	0.123084	0.118068	0.0899877	0.216374	0.11062	Up	Metabolism	Carbohydrate metabolism	Citrate cycle (TCA cycle)
ko00052 Galactose metabolism	0.0833263	1.2325	0.0020664	0.0626809	16	0.0214987	0.10812	0.228116	0.333412	0.0406219	0.19896	Up	Metabolism	Carbohydrate metabolism	Galactose metabolism
ko00010 Glycolysis / Gluconeogenesis	0.0471176	1.64286	4.05629e-05	0.00369123	30	0.109764	0.176206	0.0323802	0.00979752	0.0827707	0.0269116	Up	Metabolism	Carbohydrate metabolism	Glycolysis / Gluconeogenesis
ko00190 Oxidative phosphorylation	0.0218951	1.86093	3.16609e-06	0.000576229	105	0.0253369	0.289567	0.0605718	0.0296559	0.00171729	0.0143074	Up	Metabolism	Energy metabolism	Oxidative phosphorylation
ko00534 Glycosaminoglycan biosynthesis - heparan sulfate / heparin	0.137348	1.07406	0.00558875	0.0404121	11	0.187365	0.207044	0.125967	0.081677	0.16523	0.159261	2D	Metabolism	Glycan biosynthesis and metabolism	Glycosaminoglycan biosynthesis - heparan sulfate / heparin
ko00071 Fatty acid degradation	0.123734	1.1189	0.00356906	0.075431	24	0.111285	0.131082	0.22909	0.107239	0.170296	0.0946362	Up	Metabolism	Lipid metabolism	Fatty acid degradation
ko00561 Glycerolipid metabolism	0.104989	1.16346	0.00260146	0.0676381	25	0.0438572	0.120214	0.205257	0.0372887	0.155841	0.365006	Up	Metabolism	Lipid metabolism	Glycerolipid metabolism
ko00230 Purine metabolism	0.0482428	-1.54762	8.26894e-05	0.00175368	104	0.0957897	0.0119093	0.171859	0.0270364	0.0969707	0.0682998	Down	Metabolism	Nucleotide metabolism	Purine metabolism
ko00240 Pyrimidine metabolism	0.076519	-1.36582	0.000444496	0.00735439	73	0.0268366	0.0407979	0.261101	0.068887	0.0744443	0.183441	Down	Metabolism	Nucleotide metabolism	Pyrimidine metabolism
ko04260 Cardiac muscle contraction	0.100398	1.21563	0.00161861	0.0589173	41	0.166689	0.220423	0.176443	0.0642634	0.0487598	0.0856699	Up	Organismal Systems	Circulatory system	Cardiac muscle contraction
ko04270 Vascular smooth muscle contraction	0.0829047	1.36116	0.000468879	0.00847272	55	0.106431	0.160389	0.0710473	0.0420187	0.098792	0.0835668	2D	Organismal Systems	Circulatory system	Vascular smooth muscle contraction
ko04360 Axon guidance	0.0521382	1.58848	5.89046e-05	0.00214413	52	0.0409979	0.110182	0.029715	0.0476849	0.0459661	0.109479	2D	Organismal Systems	Development	Axon guidance
ko04320 Dorso-ventral axis formation	0.14185	1.06527	0.00577316	0.0404121	11	0.213085	0.165083	0.13003	0.162546	0.133331	0.115831	2D	Organismal Systems	Development	Dorso-ventral axis formation
ko04380 Osteoclast differentiation	0.0705871	1.42594	0.000261286	0.00528378	69	0.0997954	0.0811866	0.0954781	0.204493	0.0334891	0.0320163	2D	Organismal Systems	Development	Osteoclast differentiation
ko04973 Carbohydrate digestion and absorption	0.178388	0.874669	0.0180731	0.076647	15	0.156975	0.165171	0.116109	0.293692	0.283658	0.199707	2D	Organismal Systems	Digestive system	Carbohydrate digestion and absorption
ko04975 Fat digestion and absorption	0.0639713	1.3641	0.000715855	0.0325714	19	0.196379	0.0601227	0.124928	0.00548353	0.524038	0.0386233	Up	Organismal Systems	Digestive system	Fat digestion and absorption
ko04971 Gastric acid secretion	0.194163	0.814882	0.0242285	0.0958604	27	0.298628	0.23787	0.193801	0.090531	0.195355	0.29724	2D	Organismal Systems	Digestive system	Gastric acid secretion
ko04970 Salivary secretion	0.10538	1.22106	0.00156675	0.0203678	32	0.0706505	0.23252	0.112284	0.10351	0.0818214	0.121835	2D	Organismal Systems	Digestive system	Salivary secretion
ko04920 Adipocytokine signaling pathway	0.153642	0.984396	0.00844737	0.0495942	35	0.213052	0.216068	0.100262	0.200441	0.167008	0.118162	2D	Organismal Systems	Endocrine system	Adipocytokine signaling pathway
ko04915 Estrogen signaling pathway	0.0522223	1.53742	0.000105033	0.00318599	40	0.132421	0.0919283	0.0303049	0.0819749	0.0930964	0.0204223	2D	Organismal Systems	Endocrine system	Estrogen signaling pathway
ko04911 Insulin secretion	0.119481	1.11545	0.00344256	0.0272542	37	0.106462	0.224017	0.165278	0.077756	0.200137	0.0836923	2D	Organismal Systems	Endocrine system	Insulin secretion
ko04916 Melanogenesis	0.175853	0.876631	0.0166419	0.0738739	38	0.297275	0.246812	0.190911	0.156645	0.199471	0.101886	2D	Organismal Systems	Endocrine system	Melanogenesis
ko04913 Ovarian steroidogenesis	0.0595514	1.51916	0.000145537	0.00335281	22	0.103113	0.102459	0.0471692	0.0596923	0.128264	0.0239549	2D	Organismal Systems	Endocrine system	Ovarian Steroidogenesis
ko03320 PPAR signaling pathway	0.0669585	1.40736	0.000339393	0.0205899	42	0.23528	0.0728311	0.091025	0.0526997	0.246619	0.00607203	Up	Organismal Systems	Endocrine system	PPAR signaling pathway
ko04917 Prolactin signaling pathway	0.131121	0.99986	0.00773429	0.0469214	39	0.20104	0.136508	0.0340693	0.254107	0.328451	0.143033	2D	Organismal Systems	Endocrine system	Prolactin signaling pathway
ko04918 Thyroid hormone synthesis	0.164057	0.911364	0.0135756	0.0686604	33	0.197608	0.135693	0.226481	0.141634	0.274538	0.149393	2D	Organismal Systems	Endocrine system	Thyroid hormone synthesis
ko04713 Circadian entrainment	0.123319	1.11308	0.00342343	0.0272542	45	0.121223	0.112844	0.165149	0.146535	0.0726452	0.222974	2D	Organismal Systems	Environmental adaptation	Circadian entrainment
ko04960 Aldosterone-regulated sodium reabsorption	0.178823	0.866444	0.0195748	0.0791691	13	0.263766	0.130775	0.106618	0.31777	0.143522	0.303436	2D	Organismal Systems	Excretory system	Aldosterone-regulated sodium reabsorption
ko04662 B cell receptor signaling pathway	0.164995	0.92562	0.0122565	0.0675965	39	0.159637	0.23941	0.101086	0.331315	0.120936	0.178071	2D	Organismal Systems	Immune system	B cell receptor signaling pathway
ko04062 Chemokine signaling pathway	0.116514	1.10862	0.00344421	0.0272542	88	0.204423	0.0594478	0.285972	0.154526	0.0452194	0.168994	2D	Organismal Systems	Immune system	Chemokine signaling pathway
ko04664 Fc epsilon RI signaling pathway	0.171348	0.907337	0.0139584	0.0686604	29	0.24339	0.178843	0.180489	0.198897	0.180445	0.136294	2D	Organismal Systems	Immune system	Fc epsilon RI signaling pathway
ko04640 Hematopoietic cell lineage	0.109178	1.16811	0.00233094	0.0249548	38	0.12048	0.125055	0.190163	0.0634175	0.0900537	0.193858	2D	Organismal Systems	Immune system	Hematopoietic cell lineage
ko04650 Natural killer cell mediated cytotoxicity	0.164393	0.895754	0.0148958	0.0713432	40	0.237167	0.248106	0.160739	0.281201	0.209732	0.0607615	2D	Organismal Systems	Immune system	Natural killer cell mediated cytotoxicity
ko04621 NOD-like receptor signaling pathway	0.114298	1.1456	0.00281208	0.0272542	31	0.22513	0.194798	0.0806997	0.0750642	0.144369	0.10262	2D	Organismal Systems	Immune system	NOD-like receptor signaling pathway
ko04660 T cell receptor signaling pathway	0.0627579	1.4901	0.000147376	0.00335281	61	0.0772775	0.13192	0.103855	0.0576007	0.0512323	0.0316059	2D	Organismal Systems	Immune system	T cell receptor signaling pathway
ko04620 Toll-like receptor signaling pathway	0.0464592	1.65771	2.98794e-05	0.00181269	48	0.0926824	0.0750503	0.0357498	0.0425541	0.0269142	0.0530709	2D	Organismal Systems	Immune system	Toll-like receptor signaling pathway
ko04725 Cholinergic synapse	0.139163	1.00349	0.00739278	0.0468078	45	0.163743	0.0586724	0.169106	0.372325	0.142673	0.141445	2D	Organismal Systems	Nervous system	Cholinergic synapse
ko04724 Glutamatergic synapse	0.0802877	1.34328	0.000558641	0.00847272	50	0.0686062	0.0461902	0.21201	0.117763	0.0259962	0.188014	2D	Organismal Systems	Nervous system	Glutamatergic synapse
ko04730 Long-term depression	0.179229	0.881517	0.0163714	0.0738739	27	0.195298	0.161753	0.197556	0.250339	0.166617	0.18594	2D	Organismal Systems	Nervous system	Long-term depression
ko04720 Long-term potentiation	0.163268	0.934481	0.0118359	0.0673168	28	0.115754	0.147881	0.143223	0.294903	0.230262	0.169371	2D	Organismal Systems	Nervous system	Long-term potentiation
ko04723 Retrograde endocannabinoid signaling	0.114528	1.13372	0.00296231	0.0272542	46	0.199898	0.0410309	0.228785	0.184873	0.0685919	0.150611	2D	Organismal Systems	Nervous system	Retrograde endocannabinoid signaling

## Sheet: stress vs control DW
	p.geomean	stat.mean	p.val	q.val	set.size	T.MF.1	T.MF.2	T.MF.3	T.MF.4	T.MF.5	T.MF.6	Direction	Functional group	KEGG Sub-group	Pathway
ko04540 Gap junction	0.127053	1.09335	0.00398781	0.0290313	39	0.14437	0.0867738	0.0829165	0.270653	0.0865305	0.236389	2D	Cellular Processes	Cell communication	Gap junction
ko04110 Cell cycle	0.0149642	-2.1395	1.03621e-07	7.56817e-06	88	0.0450962	0.0123673	0.0271157	0.0233501	0.00417655	0.0129347	Down	Cellular Processes	Cell growth and death	Cell cycle
ko04111 Cell cycle - yeast	0.0320639	-1.82752	4.8363e-06	0.000146701	54	0.0309451	0.0554049	0.0873431	0.0491594	0.0196908	0.0105761	Down	Cellular Processes	Cell growth and death	Cell cycle - yeast
ko04113 Meiosis - yeast	0.0444197	-1.66183	3.00019e-05	0.00078005	41	0.052452	0.111651	0.115376	0.0504087	0.0241968	0.0147495	Down	Cellular Processes	Cell growth and death	Meiosis - yeast
ko04012 ErbB signaling pathway	0.132364	1.02805	0.00634126	0.0427448	40	0.130657	0.0738243	0.101745	0.312027	0.216578	0.161395	2D	Environmental Information Processing	Signal transduction	ErbB signaling pathway
ko04066 HIF-1 signaling pathway	0.144344	0.981936	0.00852173	0.0861642	47	0.0994125	0.148681	0.27493	0.216075	0.211376	0.0914694	Up	Environmental Information Processing	Signal transduction	HIF-1 signaling pathway
ko04390 Hippo signaling pathway	0.132011	1.00503	0.00723022	0.0453758	67	0.327304	0.0694075	0.121244	0.442164	0.0695856	0.102083	2D	Environmental Information Processing	Signal transduction	Hippo signaling pathway
ko04630 Jak-STAT signaling pathway	0.0977499	1.25731	0.00111578	0.0145051	56	0.150867	0.134812	0.0937246	0.085435	0.109746	0.0753124	2D	Environmental Information Processing	Signal transduction	Jak-STAT signaling pathway
ko04010 MAPK signaling pathway	0.089629	1.27438	0.000938606	0.0142355	110	0.0856529	0.10789	0.119476	0.0623387	0.148981	0.104601	2D	Environmental Information Processing	Signal transduction	MAPK signaling pathway
ko04064 NF-kappa B signaling pathway	0.0997696	1.22616	0.00142433	0.0158535	64	0.224534	0.131594	0.04881	0.138516	0.0870767	0.0917613	2D	Environmental Information Processing	Signal transduction	NF-kappa B signaling pathway
ko04330 Notch signaling pathway	0.132884	1.02426	0.00701282	0.0453758	21	0.176947	0.248606	0.097152	0.232136	0.0398975	0.264404	2D	Environmental Information Processing	Signal transduction	Notch signaling pathway
ko04668 TNF signaling pathway	0.0949837	1.22556	0.00144203	0.0158535	63	0.179308	0.133955	0.157252	0.178375	0.0624903	0.0350254	2D	Environmental Information Processing	Signal transduction	TNF signaling pathway
ko04060 Cytokine-cytokine receptor interaction	0.00518141	2.54185	3.71911e-10	3.38439e-08	94	0.0106862	0.00411906	0.00391403	0.0134166	0.0104171	0.00157647	2D	Environmental Information Processing	Signaling molecules and interaction	Cytokine-cytokine receptor interaction
ko04080 Neuroactive ligand-receptor interaction	0.0863916	1.01978	0.00659266	0.0857046	112	0.00405494	0.507489	0.533595	0.111174	0.308903	0.0353063	Up	Environmental Information Processing	Signaling molecules and interaction	Neuroactive ligand-receptor interaction
ko04080 Neuroactive ligand-receptor interaction	0.000654091	3.15871	1.23434e-14	2.24649e-12	112	0.00044624	0.000379282	0.00608995	0.000104322	0.00562431	0.000610888	2D	Environmental Information Processing	Signaling molecules and interaction	Neuroactive ligand-receptor interaction
ko03050 Proteasome	0.0617956	-1.36273	0.000544122	0.00990303	40	0.0100245	0.0921368	0.159341	0.0421515	0.110718	0.343705	Down	Genetic Information Processing	Folding, sorting and degradation	Proteasome
ko03410 Base excision repair	0.120378	-1.14907	0.00273317	0.0433442	28	0.0684437	0.171567	0.115354	0.133607	0.152765	0.149874	Down	Genetic Information Processing	Replication and repair	Base excision repair
ko03030 DNA replication	0.000337296	-3.54339	1.32149e-16	2.40511e-14	33	0.000429548	0.00252111	0.00188529	4.34058e-05	0.00101758	2.98537e-05	Down	Genetic Information Processing	Replication and repair	DNA replication
ko03030 DNA replication	0.0501879	1.46295	0.00025008	0.0101479	33	0.143285	0.0889586	0.384026	0.00572843	0.14269	0.013165	2D	Genetic Information Processing	Replication and repair	DNA replication
ko03440 Homologous recombination	0.129504	-1.04651	0.00614271	0.0798552	20	0.0454055	0.212627	0.194415	0.0644321	0.318448	0.214101	Down	Genetic Information Processing	Replication and repair	Homologous recombination
ko03430 Mismatch repair	0.0133826	-2.23912	1.2475e-07	7.56817e-06	18	0.00705676	0.00748164	0.0324392	0.0151543	0.0333353	0.0286504	Down	Genetic Information Processing	Replication and repair	Mismatch repair
ko03430 Mismatch repair	0.152277	0.904737	0.0155223	0.0743439	18	0.137101	0.222157	0.437386	0.0724379	0.287318	0.106154	2D	Genetic Information Processing	Replication and repair	Mismatch repair
ko03420 Nucleotide excision repair	0.0320691	-1.84772	4.41089e-06	0.000146701	35	0.0111664	0.0559011	0.0776324	0.0216917	0.0365134	0.0377523	Down	Genetic Information Processing	Replication and repair	Nucleotide excision repair
ko03040 Spliceosome	0.0706156	-1.13678	0.00285786	0.0433442	109	0.0329546	0.499262	0.531769	0.0197383	0.212007	0.0157886	Down	Genetic Information Processing	Transcription	Spliceosome
ko03008 Ribosome biogenesis in eukaryotes	0.0283802	-1.59699	5.97877e-05	0.00120904	64	0.00285478	0.145834	0.193239	0.040176	0.0112631	0.239271	Down	Genetic Information Processing	Translation	Ribosome biogenesis in eukaryotes
ko00020 Citrate cycle (TCA cycle)	0.153018	0.957349	0.0107544	0.0902077	22	0.273569	0.315477	0.121141	0.093642	0.0675353	0.285556	Up	Metabolism	Carbohydrate metabolism	Citrate cycle (TCA cycle)
ko00010 Glycolysis / Gluconeogenesis	0.0824684	1.36935	0.000476502	0.0216808	30	0.0788794	0.0400045	0.0779362	0.159437	0.0472447	0.199923	Up	Metabolism	Carbohydrate metabolism	Glycolysis / Gluconeogenesis
ko00500 Starch and sucrose metabolism	0.138904	1.00834	0.00773104	0.0861642	21	0.135204	0.100539	0.189405	0.37818	0.0734646	0.181491	Up	Metabolism	Carbohydrate metabolism	Starch and sucrose metabolism
ko00710 Carbon fixation in photosynthetic organisms	0.168375	0.956001	0.0109042	0.0902077	15	0.214354	0.143999	0.119022	0.227664	0.122984	0.248952	Up	Metabolism	Energy metabolism	Carbon fixation in photosynthetic organisms
ko00190 Oxidative phosphorylation	0.0756199	1.28123	0.000910034	0.030145	105	0.26218	0.0252128	0.0363928	0.166661	0.0510207	0.258435	Up	Metabolism	Energy metabolism	Oxidative phosphorylation
ko00534 Glycosaminoglycan biosynthesis - heparan sulfate / heparin	0.0961398	1.2603	0.00169285	0.016193	11	0.0879326	0.183361	0.111591	0.142446	0.0338777	0.209683	2D	Metabolism	Glycan biosynthesis and metabolism	Glycosaminoglycan biosynthesis - heparan sulfate / heparin
ko00071 Fatty acid degradation	0.118144	1.09523	0.00437612	0.0663711	24	0.109323	0.227539	0.100099	0.0987281	0.0546711	0.392251	Up	Metabolism	Lipid metabolism	Fatty acid degradation
ko00564 Glycerophospholipid metabolism	0.0863614	1.26307	0.00111125	0.030145	44	0.152669	0.0837322	0.103785	0.213195	0.0996026	0.0402761	Up	Metabolism	Lipid metabolism	Glycerophospholipid metabolism
ko00670 One carbon pool by folate	0.127485	-1.0997	0.00472154	0.0661015	13	0.139944	0.120993	0.18493	0.0818214	0.255938	0.122686	Down	Metabolism	Metabolism of cofactors and vitamins	One carbon pool by folate
ko00230 Purine metabolism	0.0391058	-1.63329	3.54268e-05	0.000805959	104	0.0111507	0.142358	0.344703	0.0366763	0.0128192	0.0252391	Down	Metabolism	Nucleotide metabolism	Purine metabolism
ko00240 Pyrimidine metabolism	0.0253943	-1.87341	2.79692e-06	0.00012726	73	0.0187245	0.0853044	0.129293	0.00639871	0.00813291	0.0494188	Down	Metabolism	Nucleotide metabolism	Pyrimidine metabolism
ko04270 Vascular smooth muscle contraction	0.152453	0.968379	0.00920742	0.0881974	55	0.249723	0.137273	0.259776	0.0912806	0.0896963	0.246271	Up	Organismal Systems	Circulatory system	Vascular smooth muscle contraction
ko04270 Vascular smooth muscle contraction	0.0843967	1.32251	0.000657655	0.0141954	55	0.101475	0.058532	0.0843917	0.11557	0.0842716	0.140424	2D	Organismal Systems	Circulatory system	Vascular smooth muscle contraction
ko04360 Axon guidance	0.0715225	1.42239	0.000278788	0.0101479	52	0.0849913	0.056636	0.0420539	0.143446	0.0703942	0.108746	2D	Organismal Systems	Development	Axon guidance
ko04320 Dorso-ventral axis formation	0.102435	1.24634	0.00177945	0.016193	11	0.0970077	0.0994637	0.118278	0.114711	0.249898	0.0673108	2D	Organismal Systems	Development	Dorso-ventral axis formation
ko04380 Osteoclast differentiation	0.0838583	1.30881	0.000727097	0.0141954	69	0.0861457	0.0972181	0.0435084	0.163716	0.196841	0.055656	2D	Organismal Systems	Development	Osteoclast differentiation
ko04975 Fat digestion and absorption	0.0300635	1.86073	6.9775e-06	0.000634953	19	0.10163	0.0150371	0.0356183	0.0606207	0.00527873	0.0985291	Up	Organismal Systems	Digestive system	Fat digestion and absorption
ko04971 Gastric acid secretion	0.131987	0.962105	0.0104894	0.0902077	27	0.204678	0.0755434	0.247883	0.0202917	0.304707	0.438902	Up	Organismal Systems	Digestive system	Gastric acid secretion
ko04971 Gastric acid secretion	0.143622	0.979975	0.00902678	0.0513398	27	0.0865324	0.23094	0.163311	0.0905882	0.178494	0.324741	2D	Organismal Systems	Digestive system	Gastric acid secretion
ko04972 Pancreatic secretion	0.0742375	1.26413	0.00115942	0.030145	43	0.414852	0.00344578	0.0319286	0.3089	0.0619311	0.256817	Up	Organismal Systems	Digestive system	Pancreatic secretion
ko04974 Protein digestion and absorption	0.0910784	1.12187	0.00344231	0.0599645	40	0.334324	0.0381404	0.0590746	0.559603	0.0280142	0.136691	Up	Organismal Systems	Digestive system	Protein digestion and absorption
ko04970 Salivary secretion	0.0820816	1.31818	0.000740055	0.0141954	32	0.0829383	0.116616	0.0471067	0.10037	0.059825	0.242301	2D	Organismal Systems	Digestive system	Salivary secretion
ko04977 Vitamin digestion and absorption	0.108202	1.17639	0.00251782	0.0572803	17	0.177645	0.321086	0.126319	0.101601	0.0695949	0.0563817	Up	Organismal Systems	Digestive system	Vitamin digestion and absorption
ko04920 Adipocytokine signaling pathway	0.0466801	1.63584	4.10435e-05	0.00248997	35	0.0954154	0.00942797	0.0814766	0.0922029	0.0325089	0.0774417	Up	Organismal Systems	Endocrine system	Adipocytokine signaling pathway
ko04920 Adipocytokine signaling pathway	0.0870813	1.29746	0.000857966	0.0141954	35	0.123528	0.194315	0.164485	0.0652524	0.0423191	0.0738201	2D	Organismal Systems	Endocrine system	Adipocytokine signaling pathway
ko04915 Estrogen signaling pathway	0.084071	1.29998	0.000836148	0.0141954	40	0.0684063	0.0988477	0.129627	0.147385	0.0627318	0.112238	2D	Organismal Systems	Endocrine system	Estrogen signaling pathway
ko04911 Insulin secretion	0.142743	0.999658	0.00768243	0.0861642	37	0.181713	0.0380356	0.189469	0.282663	0.172796	0.196011	Up	Organismal Systems	Endocrine system	Insulin secretion
ko04911 Insulin secretion	0.072761	1.36643	0.000489639	0.0141954	37	0.0514299	0.0755874	0.0329696	0.0923204	0.0948016	0.297779	2D	Organismal Systems	Endocrine system	Insulin secretion
ko04910 Insulin signaling pathway	0.112455	1.12852	0.00304628	0.0599645	56	0.10685	0.159545	0.251446	0.274871	0.114131	0.0224477	Up	Organismal Systems	Endocrine system	Insulin signaling pathway
ko04913 Ovarian steroidogenesis	0.0910015	1.24312	0.00148082	0.0158535	22	0.255137	0.0945585	0.0370788	0.188729	0.0434733	0.176818	2D	Organismal Systems	Endocrine system	Ovarian Steroidogenesis
ko03320 PPAR signaling pathway	0.0312166	1.82674	5.38916e-06	0.000634953	42	0.0674	0.011993	0.00497031	0.0538492	0.0453341	0.125305	Up	Organismal Systems	Endocrine system	PPAR signaling pathway
ko04917 Prolactin signaling pathway	0.113385	1.16979	0.00227407	0.0197086	39	0.110868	0.16171	0.114146	0.160477	0.121766	0.0842012	2D	Organismal Systems	Endocrine system	Prolactin signaling pathway
ko04614 Renin-angiotensin system	0.118679	1.15446	0.00362423	0.0599645	10	0.102166	0.409292	0.0528641	0.0514318	0.159431	0.202396	Up	Organismal Systems	Endocrine system	Renin-angiotensin system
ko04918 Thyroid hormone synthesis	0.10559	1.15332	0.00271642	0.0219732	33	0.0888242	0.103167	0.13049	0.118153	0.08912	0.293308	2D	Organismal Systems	Endocrine system	Thyroid hormone synthesis
ko04713 Circadian entrainment	0.139075	0.968489	0.00938831	0.0517779	45	0.163971	0.116695	0.114562	0.136402	0.157618	0.388718	2D	Organismal Systems	Environmental adaptation	Circadian entrainment
ko04710 Circadian rhythm	0.161828	0.93758	0.0121467	0.0614084	19	0.204812	0.190009	0.192532	0.170667	0.132256	0.189693	2D	Organismal Systems	Environmental adaptation	Circadian rhythm
ko04960 Aldosterone-regulated sodium reabsorption	0.176558	0.869211	0.0193405	0.0902555	13	0.148329	0.207061	0.0897522	0.186245	0.242955	0.392329	2D	Organismal Systems	Excretory system	Aldosterone-regulated sodium reabsorption
ko04961 Endocrine and other factor-regulated calcium reabsorption	0.152673	0.933292	0.0126505	0.0622266	20	0.06729	0.214476	0.126292	0.129127	0.302404	0.344736	2D	Organismal Systems	Excretory system	Endocrine and other factor-regulated calcium reabsorption
ko04062 Chemokine signaling pathway	0.117234	1.12595	0.00301776	0.0228847	88	0.182725	0.0955988	0.0778385	0.185586	0.118898	0.154032	2D	Organismal Systems	Immune system	Chemokine signaling pathway
ko04610 Complement and coagulation cascades	0.0791909	1.0708	0.00495786	0.0694101	56	0.060583	0.250341	0.700784	0.278648	0.0477702	0.00898484	Up	Organismal Systems	Immune system	Complement and coagulation cascades
ko04640 Hematopoietic cell lineage	0.133582	0.991805	0.00818487	0.0480531	38	0.321766	0.414379	0.106796	0.0768152	0.182166	0.0522532	2D	Organismal Systems	Immune system	Hematopoietic cell lineage
ko04621 NOD-like receptor signaling pathway	0.0940986	1.21471	0.00172226	0.016193	31	0.157662	0.100626	0.151686	0.179847	0.0696757	0.0722448	2D	Organismal Systems	Immune system	NOD-like receptor signaling pathway
ko04622 RIG-I-like receptor signaling pathway	0.116728	1.14447	0.00277683	0.0219732	36	0.182084	0.100331	0.174348	0.165635	0.0692412	0.112136	2D	Organismal Systems	Immune system	RIG-I-like receptor signaling pathway
ko04660 T cell receptor signaling pathway	0.123104	1.05412	0.00518422	0.0362895	61	0.313498	0.219299	0.0291945	0.113653	0.167842	0.169683	2D	Organismal Systems	Immune system	T cell receptor signaling pathway
ko04620 Toll-like receptor signaling pathway	0.0392578	1.68443	2.37587e-05	0.00144136	48	0.0830979	0.0473349	0.0362754	0.0786834	0.022063	0.0459925	2D	Organismal Systems	Immune system	Toll-like receptor signaling pathway
ko04725 Cholinergic synapse	0.140392	0.949428	0.0106745	0.0555076	45	0.0429224	0.257773	0.184846	0.124729	0.257563	0.284148	2D	Organismal Systems	Nervous system	Cholinergic synapse
ko04727 GABAergic synapse	0.138017	0.989144	0.00829782	0.0861642	38	0.113799	0.147517	0.171732	0.0499377	0.280531	0.329936	Up	Organismal Systems	Nervous system	GABAergic synapse
ko04724 Glutamatergic synapse	0.0881267	1.26833	0.00104812	0.0145051	50	0.0692851	0.116594	0.127005	0.0464674	0.158228	0.149318	2D	Organismal Systems	Nervous system	Glutamatergic synapse
ko04720 Long-term potentiation	0.147085	0.995925	0.0080026	0.0480531	28	0.0801252	0.16352	0.123602	0.182135	0.210556	0.25879	2D	Organismal Systems	Nervous system	Long-term potentiation
ko04723 Retrograde endocannabinoid signaling	0.152741	0.958191	0.00992995	0.0531545	46	0.102746	0.177163	0.244849	0.110958	0.223228	0.200745	2D	Organismal Systems	Nervous system	Retrograde endocannabinoid signaling
