# Supplementary material for: Transcriptomic comparison of communally reared wild, domesticated and hybrid Atlantic salmon fry under stress and control conditions
Source: BMC Genet. 2020 May 29;21:57. doi: 10.1186/s12863-020-00858-y (PMC7257211; doi:10.1186/s12863-020-00858-y)
Supplement: Supplementary file 2 — Additional file 2. The complete lists of KEGG pathways identified by the romer function. [file 12863_2020_858_MOESM2_ESM.xlsx]

## Sheet: domesticated vs wild control
	NGenes	Up	Down	Mixed	Functional group	KEGG Sub-group	Pathway
ko04520 Adherens junction	44	0.9872	0.0129	0.6622	Cellular Processes	Cell communication	Adherens junction
ko04510 Focal adhesion	98	0.9998	0.0003	0.0842	Cellular Processes	Cell communication	Focal adhesion
ko04111 Cell cycle - yeast	54	0.0329	0.9672	0.6327	Cellular Processes	Cell growth and death	Cell cycle - yeast
ko04810 Regulation of actin cytoskeleton	95	1	0.0001	0.1878	Cellular Processes	Cell motility	Regulation of actin cytoskeleton
ko04144 Endocytosis	105	0.9979	0.0022	0.4945	Cellular Processes	Transport and catabolism	Endocytosis
ko04146 Peroxisome	54	0.0107	0.9894	0.1969	Cellular Processes	Transport and catabolism	Peroxisome
ko04145 Phagosome	76	0.9993	0.0008	0.0131	Cellular Processes	Transport and catabolism	Phagosome
ko04020 Calcium signaling pathway	72	0.999	0.0011	0.4687	Environmental Information Processing	Signal transduction	Calcium signaling pathway
ko04630 Jak-STAT signaling pathway	56	0.9984	0.0017	0.9456	Environmental Information Processing	Signal transduction	Jak-STAT signaling pathway
ko04010 MAPK signaling pathway	110	0.9826	0.0175	0.9087	Environmental Information Processing	Signal transduction	MAPK signaling pathway
ko04064 NF-kappa B signaling pathway	64	0.9982	0.0019	0.4123	Environmental Information Processing	Signal transduction	NF-kappa B signaling pathway
ko04151 PI3K-Akt signaling pathway	149	0.9997	0.0004	0.0011	Environmental Information Processing	Signal transduction	PI3K-Akt signaling pathway
ko04350 TGF-beta signaling pathway	44	0.963	0.0371	0.956	Environmental Information Processing	Signal transduction	TGF-beta signaling pathway
ko04370 VEGF signaling pathway	28	0.9817	0.0184	0.3937	Environmental Information Processing	Signal transduction	VEGF signaling pathway
ko04514 Cell adhesion molecules (CAMs)	64	0.9944	0.0057	0.011	Environmental Information Processing	Signaling molecules and interaction	Cell adhesion molecules (CAMs)
ko04060 Cytokine-cytokine receptor interaction	94	0.9999	0.0002	0.6592	Environmental Information Processing	Signaling molecules and interaction	Cytokine-cytokine receptor interaction
ko04512 ECM-receptor interaction	38	0.9504	0.0497	0.1846	Environmental Information Processing	Signaling molecules and interaction	ECM-receptor interaction
ko04080 Neuroactive ligand-receptor interaction	112	0.9933	0.0068	0.998	Environmental Information Processing	Signaling molecules and interaction	Neuroactive ligand-receptor interaction
ko03050 Proteasome	40	0.0015	0.9986	0.0004	Genetic Information Processing	Folding, sorting and degradation	Proteasome
ko03020 RNA polymerase	27	0.0001	1	0.3278	Genetic Information Processing	Transcription	RNA polymerase
ko00970 Aminoacyl-tRNA biosynthesis	28	0.0044	0.9957	0.1691	Genetic Information Processing	Translation	Aminoacyl-tRNA biosynthesis
ko03010 Ribosome	118	0.019	0.9811	0.0213	Genetic Information Processing	Translation	Ribosome
ko03008 Ribosome biogenesis in eukaryotes	64	0.0198	0.9803	0.1743	Genetic Information Processing	Translation	Ribosome biogenesis in eukaryotes
ko03013 RNA transport	111	0.0317	0.9684	0.4322	Genetic Information Processing	Translation	RNA transport
ko00330 Arginine and proline metabolism	36	0.03	0.9702	0.4041	Metabolism	Amino acid metabolism	Arginine and proline metabolism
ko00340 Histidine metabolism	14	0.0065	0.9936	0.0377	Metabolism	Amino acid metabolism	Histidine metabolism
ko00380 Tryptophan metabolism	29	0.1967	0.8034	0.0025	Metabolism	Amino acid metabolism	Tryptophan metabolism
ko00520 Amino sugar and nucleotide sugar metabolism	35	0.0001	1	0.0013	Metabolism	Carbohydrate metabolism	Amino sugar and nucleotide sugar metabolism
ko00650 Butanoate metabolism	16	0.032	0.9681	0.0054	Metabolism	Carbohydrate metabolism	Butanoate metabolism
ko00020 Citrate cycle (TCA cycle)	22	0.7403	0.2598	0.0113	Metabolism	Carbohydrate metabolism	Citrate cycle (TCA cycle)
ko00051 Fructose and mannose metabolism	19	0.0056	0.9945	0.0004	Metabolism	Carbohydrate metabolism	Fructose and mannose metabolism
ko00052 Galactose metabolism	16	0.0047	0.9954	0.0246	Metabolism	Carbohydrate metabolism	Galactose metabolism
ko00010 Glycolysis / Gluconeogenesis	30	0.0096	0.9905	0.0001	Metabolism	Carbohydrate metabolism	Glycolysis / Gluconeogenesis
ko00040 Pentose and glucuronate interconversions	13	0.1525	0.8478	0.0196	Metabolism	Carbohydrate metabolism	Pentose and glucuronate interconversions
ko00640 Propanoate metabolism	22	0.5672	0.4331	0.0409	Metabolism	Carbohydrate metabolism	Propanoate metabolism
ko00620 Pyruvate metabolism	25	0.0229	0.9772	0.0017	Metabolism	Carbohydrate metabolism	Pyruvate metabolism
ko00500 Starch and sucrose metabolism	21	0.5938	0.4063	0.0464	Metabolism	Carbohydrate metabolism	Starch and sucrose metabolism
ko00710 Carbon fixation in photosynthetic organisms	15	0.1399	0.8602	0.0249	Metabolism	Energy metabolism	Carbon fixation in photosynthetic organisms
ko00680 Methane metabolism	14	0.3742	0.6259	0.002	Metabolism	Energy metabolism	Methane metabolism
ko00510 N-Glycan biosynthesis	31	0.0122	0.988	0.2805	Metabolism	Glycan biosynthesis and metabolism	N-Glycan biosynthesis
ko00513 Various types of N-glycan biosynthesis	20	0.0446	0.9555	0.5294	Metabolism	Glycan biosynthesis and metabolism	Various types of N-glycan biosynthesis
ko00590 Arachidonic acid metabolism	26	0.5641	0.436	0.0108	Metabolism	Lipid metabolism	Arachidonic acid metabolism
ko01040 Biosynthesis of unsaturated fatty acids	15	0.0001	1	0.0078	Metabolism	Lipid metabolism	Biosynthesis of unsaturated fatty acids
ko00565 Ether lipid metabolism	17	0.2937	0.7065	0.0269	Metabolism	Lipid metabolism	Ether lipid metabolism
ko00071 Fatty acid degradation	24	0.0887	0.9115	0.0137	Metabolism	Lipid metabolism	Fatty acid degradation
ko00062 Fatty acid elongation	18	0.019	0.9811	0.0127	Metabolism	Lipid metabolism	Fatty acid elongation
ko00561 Glycerolipid metabolism	25	0.0007	0.9994	0.0002	Metabolism	Lipid metabolism	Glycerolipid metabolism
ko00120 Primary bile acid biosynthesis	12	0.0017	0.9984	0.0136	Metabolism	Lipid metabolism	Primary bile acid biosynthesis
ko00600 Sphingolipid metabolism	21	0.0004	0.9997	0.2848	Metabolism	Lipid metabolism	Sphingolipid metabolism
ko00830 Retinol metabolism	22	0.5308	0.4694	0.0353	Metabolism	Metabolism of cofactors and vitamins	Retinol metabolism
ko00410 beta-Alanine metabolism	21	0.5003	0.5	0.01	Metabolism	Metabolism of other amino acids	beta-Alanine metabolism
ko00900 Terpenoid backbone biosynthesis	15	0.0002	0.9999	0.3229	Metabolism	Metabolism of terpenoids and polyketides	Terpenoid backbone biosynthesis
ko00230 Purine metabolism	104	0.0029	0.9972	0.1774	Metabolism	Nucleotide metabolism	Purine metabolism
ko00240 Pyrimidine metabolism	73	0.0008	0.9993	0.0174	Metabolism	Nucleotide metabolism	Pyrimidine metabolism
ko00982 Drug metabolism - cytochrome P450	11	0.9989	0.0012	0.0004	Metabolism	Xenobiotics biodegradation and metabolism	Drug metabolism - cytochrome P450
ko00983 Drug metabolism - other enzymes	19	0.7509	0.2494	0.0001	Metabolism	Xenobiotics biodegradation and metabolism	Drug metabolism - other enzymes
ko00980 Metabolism of xenobiotics by cytochrome P450	15	0.9788	0.0213	0.0008	Metabolism	Xenobiotics biodegradation and metabolism	Metabolism of xenobiotics by cytochrome P450
ko04260 Cardiac muscle contraction	41	0.2899	0.7103	0.0001	Organismal Systems	Circulatory system	Cardiac muscle contraction
ko04270 Vascular smooth muscle contraction	55	0.995	0.0051	0.4914	Organismal Systems	Circulatory system	Vascular smooth muscle contraction
ko04360 Axon guidance	52	1	0.0001	0.8927	Organismal Systems	Development	Axon guidance
ko04380 Osteoclast differentiation	69	0.9693	0.0308	0.6768	Organismal Systems	Development	Osteoclast differentiation
ko04976 Bile secretion	39	0.0003	0.9998	0.0203	Organismal Systems	Digestive system	Bile secretion
ko04973 Carbohydrate digestion and absorption	15	0.0096	0.9906	0.0091	Organismal Systems	Digestive system	Carbohydrate digestion and absorption
ko04975 Fat digestion and absorption	19	0.004	0.9961	0.0002	Organismal Systems	Digestive system	Fat digestion and absorption
ko04978 Mineral absorption	25	0.0012	0.9989	0.0062	Organismal Systems	Digestive system	Mineral absorption
ko04974 Protein digestion and absorption	40	0.3537	0.6464	0.0006	Organismal Systems	Digestive system	Protein digestion and absorption
ko04977 Vitamin digestion and absorption	17	0.0225	0.9776	0.0017	Organismal Systems	Digestive system	Vitamin digestion and absorption
ko04913 Ovarian steroidogenesis	22	0.98	0.0201	0.9345	Organismal Systems	Endocrine system	Ovarian Steroidogenesis
ko03320 PPAR signaling pathway	42	0.0284	0.9717	0.0944	Organismal Systems	Endocrine system	PPAR signaling pathway
ko04918 Thyroid hormone synthesis	33	0.0184	0.9817	0.0279	Organismal Systems	Endocrine system	Thyroid hormone synthesis
ko04713 Circadian entrainment	45	0.963	0.0371	0.7566	Organismal Systems	Environmental adaptation	Circadian entrainment
ko04964 Proximal tubule bicarbonate reclamation	11	0.4086	0.5916	0.0091	Organismal Systems	Excretory system	Proximal tubule bicarbonate reclamation
ko04612 Antigen processing and presentation	30	0.7924	0.2077	0.0001	Organismal Systems	Immune system	Antigen processing and presentation
ko04662 B cell receptor signaling pathway	39	0.9846	0.0155	0.563	Organismal Systems	Immune system	B cell receptor signaling pathway
ko04062 Chemokine signaling pathway	88	1	0.0001	0.0018	Organismal Systems	Immune system	Chemokine signaling pathway
ko04610 Complement and coagulation cascades	56	0.9987	0.0014	0.0003	Organismal Systems	Immune system	Complement and coagulation cascades
ko04664 Fc epsilon RI signaling pathway	29	0.9785	0.0216	0.1178	Organismal Systems	Immune system	Fc epsilon RI signaling pathway
ko04666 Fc gamma R-mediated phagocytosis	43	0.9853	0.0148	0.0003	Organismal Systems	Immune system	Fc gamma R-mediated phagocytosis
ko04640 Hematopoietic cell lineage	38	0.966	0.0341	0.0213	Organismal Systems	Immune system	Hematopoietic cell lineage
ko04670 Leukocyte transendothelial migration	57	0.9968	0.0033	0.0185	Organismal Systems	Immune system	Leukocyte transendothelial migration
ko04650 Natural killer cell mediated cytotoxicity	40	1	0.0001	0.0261	Organismal Systems	Immune system	Natural killer cell mediated cytotoxicity
ko04660 T cell receptor signaling pathway	61	0.9765	0.0236	0.1914	Organismal Systems	Immune system	T cell receptor signaling pathway
ko04727 GABAergic synapse	38	0.9946	0.0055	0.1415	Organismal Systems	Nervous system	GABAergic synapse
ko04724 Glutamatergic synapse	50	0.9992	0.0009	0.7979	Organismal Systems	Nervous system	Glutamatergic synapse
ko04726 Serotonergic synapse	49	1	0.0001	0.7993	Organismal Systems	Nervous system	Serotonergic synapse
ko04721 Synaptic vesicle cycle	35	0.9853	0.0148	0.3125	Organismal Systems	Nervous system	Synaptic vesicle cycle
ko04744 Phototransduction	14	1	0.0001	0.1448	Organismal Systems	Sensory system	Phototransduction

## Sheet: domesticated vs wild stress
	NGenes	Up	Down	Mixed	Functional group	KEGG Sub-group	Pathway
ko04510 Focal adhesion	98	0.9957	0.0044	0.147	Cellular Processes	Cell communication	Focal adhesion
ko04540 Gap junction	39	0.9812	0.0189	0.8669	Cellular Processes	Cell communication	Gap junction
ko04110 Cell cycle	88	0.0017	0.9984	0.6213	Cellular Processes	Cell growth and death	Cell cycle
ko04111 Cell cycle - yeast	54	0.0012	0.9989	0.3313	Cellular Processes	Cell growth and death	Cell cycle - yeast
ko04810 Regulation of actin cytoskeleton	95	1	0.0001	0.1732	Cellular Processes	Cell motility	Regulation of actin cytoskeleton
ko04144 Endocytosis	105	0.9966	0.0035	0.7924	Cellular Processes	Transport and catabolism	Endocytosis
ko04146 Peroxisome	54	0.0043	0.9958	0.0857	Cellular Processes	Transport and catabolism	Peroxisome
ko04145 Phagosome	76	1	0.0001	0.0007	Cellular Processes	Transport and catabolism	Phagosome
ko02010 ABC transporters	27	0.0778	0.9223	0.0082	Environmental Information Processing	Membrane transport	ABC transporters
ko04020 Calcium signaling pathway	72	1	0.0001	0.7062	Environmental Information Processing	Signal transduction	Calcium signaling pathway
ko04391 Hippo signaling pathway - fly	29	0.0117	0.9884	0.7039	Environmental Information Processing	Signal transduction	Hippo signaling pathway - fly
ko04010 MAPK signaling pathway	110	0.9872	0.0129	0.9561	Environmental Information Processing	Signal transduction	MAPK signaling pathway
ko04151 PI3K-Akt signaling pathway	149	0.9999	0.0002	0.1524	Environmental Information Processing	Signal transduction	PI3K-Akt signaling pathway
ko04370 VEGF signaling pathway	28	0.9744	0.0257	0.096	Environmental Information Processing	Signal transduction	VEGF signaling pathway
ko04514 Cell adhesion molecules (CAMs)	64	0.9617	0.0385	0.2614	Environmental Information Processing	Signaling molecules and interaction	Cell adhesion molecules (CAMs)
ko04060 Cytokine-cytokine receptor interaction	94	0.9748	0.0253	0.4942	Environmental Information Processing	Signaling molecules and interaction	Cytokine-cytokine receptor interaction
ko04512 ECM-receptor interaction	38	0.9781	0.022	0.4805	Environmental Information Processing	Signaling molecules and interaction	ECM-receptor interaction
ko03050 Proteasome	40	0.0141	0.986	0.0183	Genetic Information Processing	Folding, sorting and degradation	Proteasome
ko03018 RNA degradation	50	0.0616	0.9385	0.0493	Genetic Information Processing	Folding, sorting and degradation	RNA degradation
ko03410 Base excision repair	28	0.0019	0.9982	0.8184	Genetic Information Processing	Replication and repair	Base excision repair
ko03030 DNA replication	33	0.023	0.9771	0.0854	Genetic Information Processing	Replication and repair	DNA replication
ko03440 Homologous recombination	20	0.0303	0.9698	0.6549	Genetic Information Processing	Replication and repair	Homologous recombination
ko03430 Mismatch repair	18	0.0005	0.9996	0.1205	Genetic Information Processing	Replication and repair	Mismatch repair
ko03420 Nucleotide excision repair	35	0.0383	0.9618	0.5062	Genetic Information Processing	Replication and repair	Nucleotide excision repair
ko03020 RNA polymerase	27	0.0001	1	0.1887	Genetic Information Processing	Transcription	RNA polymerase
ko03040 Spliceosome	109	0.012	0.9881	0.3766	Genetic Information Processing	Transcription	Spliceosome
ko00970 Aminoacyl-tRNA biosynthesis	28	0.0023	0.9978	0.1448	Genetic Information Processing	Translation	Aminoacyl-tRNA biosynthesis
ko03010 Ribosome	118	0.0012	0.9989	0.0001	Genetic Information Processing	Translation	Ribosome
ko03008 Ribosome biogenesis in eukaryotes	64	0.0046	0.9955	0.0007	Genetic Information Processing	Translation	Ribosome biogenesis in eukaryotes
ko03013 RNA transport	111	0.0132	0.9869	0.0338	Genetic Information Processing	Translation	RNA transport
ko00250 Alanine, aspartate and glutamate metabolism	23	0.8798	0.1204	0.0453	Metabolism	Amino acid metabolism	Alanine, aspartate and glutamate metabolism
ko00310 Lysine degradation	33	0.5169	0.4833	0.0396	Metabolism	Amino acid metabolism	Lysine degradation
ko00380 Tryptophan metabolism	29	0.7945	0.2056	0.0488	Metabolism	Amino acid metabolism	Tryptophan metabolism
ko00520 Amino sugar and nucleotide sugar metabolism	35	0.0001	1	0.0001	Metabolism	Carbohydrate metabolism	Amino sugar and nucleotide sugar metabolism
ko00020 Citrate cycle (TCA cycle)	22	0.9374	0.0627	0.0132	Metabolism	Carbohydrate metabolism	Citrate cycle (TCA cycle)
ko00051 Fructose and mannose metabolism	19	0.0104	0.9897	0.001	Metabolism	Carbohydrate metabolism	Fructose and mannose metabolism
ko00052 Galactose metabolism	16	0.0107	0.9894	0.0051	Metabolism	Carbohydrate metabolism	Galactose metabolism
ko00010 Glycolysis / Gluconeogenesis	30	0.2555	0.7447	0.006	Metabolism	Carbohydrate metabolism	Glycolysis / Gluconeogenesis
ko00040 Pentose and glucuronate interconversions	13	0.1025	0.8976	0.0003	Metabolism	Carbohydrate metabolism	Pentose and glucuronate interconversions
ko00620 Pyruvate metabolism	25	0.0641	0.936	0.0234	Metabolism	Carbohydrate metabolism	Pyruvate metabolism
ko00500 Starch and sucrose metabolism	21	0.7405	0.2597	0.0027	Metabolism	Carbohydrate metabolism	Starch and sucrose metabolism
ko00680 Methane metabolism	14	0.2482	0.752	0.0025	Metabolism	Energy metabolism	Methane metabolism
ko00510 N-Glycan biosynthesis	31	0.0067	0.9934	0.0691	Metabolism	Glycan biosynthesis and metabolism	N-Glycan biosynthesis
ko00513 Various types of N-glycan biosynthesis	20	0.0297	0.9704	0.1451	Metabolism	Glycan biosynthesis and metabolism	Various types of N-glycan biosynthesis
ko01040 Biosynthesis of unsaturated fatty acids	15	0.0002	0.9999	0.0017	Metabolism	Lipid metabolism	Biosynthesis of unsaturated fatty acids
ko00062 Fatty acid elongation	18	0.0229	0.9772	0.4342	Metabolism	Lipid metabolism	Fatty acid elongation
ko00561 Glycerolipid metabolism	25	0.0196	0.9805	0.1038	Metabolism	Lipid metabolism	Glycerolipid metabolism
ko00120 Primary bile acid biosynthesis	12	0.0046	0.9955	0.0001	Metabolism	Lipid metabolism	Primary bile acid biosynthesis
ko00600 Sphingolipid metabolism	21	0.0072	0.9929	0.5417	Metabolism	Lipid metabolism	Sphingolipid metabolism
ko00760 Nicotinate and nicotinamide metabolism	12	0.5793	0.4211	0.0139	Metabolism	Metabolism of cofactors and vitamins	Nicotinate and nicotinamide metabolism
ko00480 Glutathione metabolism	23	0.2574	0.7427	0.0077	Metabolism	Metabolism of other amino acids	Glutathione metabolism
ko00900 Terpenoid backbone biosynthesis	15	0.0036	0.9965	0.3039	Metabolism	Metabolism of terpenoids and polyketides	Terpenoid backbone biosynthesis
ko00230 Purine metabolism	104	0.0075	0.9926	0.1879	Metabolism	Nucleotide metabolism	Purine metabolism
ko00240 Pyrimidine metabolism	73	0.0003	0.9998	0.0598	Metabolism	Nucleotide metabolism	Pyrimidine metabolism
ko00982 Drug metabolism - cytochrome P450	11	0.9995	0.0006	0.0051	Metabolism	Xenobiotics biodegradation and metabolism	Drug metabolism - cytochrome P450
ko00983 Drug metabolism - other enzymes	19	0.844	0.1561	0.0018	Metabolism	Xenobiotics biodegradation and metabolism	Drug metabolism - other enzymes
ko00980 Metabolism of xenobiotics by cytochrome P450	15	0.9866	0.0135	0.0073	Metabolism	Xenobiotics biodegradation and metabolism	Metabolism of xenobiotics by cytochrome P450
ko04270 Vascular smooth muscle contraction	55	0.9988	0.0013	0.3466	Organismal Systems	Circulatory system	Vascular smooth muscle contraction
ko04380 Osteoclast differentiation	69	0.9849	0.0152	0.5173	Organismal Systems	Development	Osteoclast differentiation
ko04976 Bile secretion	39	0.0038	0.9963	0.0779	Organismal Systems	Digestive system	Bile secretion
ko04975 Fat digestion and absorption	19	0.035	0.9651	0.0025	Organismal Systems	Digestive system	Fat digestion and absorption
ko04974 Protein digestion and absorption	40	0.5491	0.451	0.0286	Organismal Systems	Digestive system	Protein digestion and absorption
ko04970 Salivary secretion	32	0.9984	0.0017	0.1388	Organismal Systems	Digestive system	Salivary secretion
ko04977 Vitamin digestion and absorption	17	0.0349	0.9652	0.1715	Organismal Systems	Digestive system	Vitamin digestion and absorption
ko04920 Adipocytokine signaling pathway	35	0.9558	0.0443	0.6642	Organismal Systems	Endocrine system	Adipocytokine signaling pathway
ko04911 Insulin secretion	37	0.9746	0.0255	0.472	Organismal Systems	Endocrine system	Insulin secretion
ko04910 Insulin signaling pathway	56	0.9955	0.0046	0.9427	Organismal Systems	Endocrine system	Insulin signaling pathway
ko04913 Ovarian steroidogenesis	22	0.9825	0.0176	0.904	Organismal Systems	Endocrine system	Ovarian Steroidogenesis
ko03320 PPAR signaling pathway	42	0.3127	0.6874	0.0008	Organismal Systems	Endocrine system	PPAR signaling pathway
ko04713 Circadian entrainment	45	0.9962	0.0039	0.9928	Organismal Systems	Environmental adaptation	Circadian entrainment
ko04612 Antigen processing and presentation	30	0.9133	0.0868	0.0001	Organismal Systems	Immune system	Antigen processing and presentation
ko04662 B cell receptor signaling pathway	39	1	0.0001	0.7311	Organismal Systems	Immune system	B cell receptor signaling pathway
ko04062 Chemokine signaling pathway	88	1	0.0001	0.0036	Organismal Systems	Immune system	Chemokine signaling pathway
ko04610 Complement and coagulation cascades	56	0.9998	0.0003	0.0001	Organismal Systems	Immune system	Complement and coagulation cascades
ko04664 Fc epsilon RI signaling pathway	29	0.9979	0.0022	0.0103	Organismal Systems	Immune system	Fc epsilon RI signaling pathway
ko04666 Fc gamma R-mediated phagocytosis	43	0.993	0.0071	0.02	Organismal Systems	Immune system	Fc gamma R-mediated phagocytosis
ko04640 Hematopoietic cell lineage	38	0.951	0.0491	0.3302	Organismal Systems	Immune system	Hematopoietic cell lineage
ko04670 Leukocyte transendothelial migration	57	0.9228	0.0773	0.0173	Organismal Systems	Immune system	Leukocyte transendothelial migration
ko04650 Natural killer cell mediated cytotoxicity	40	1	0.0001	0.0695	Organismal Systems	Immune system	Natural killer cell mediated cytotoxicity
ko04727 GABAergic synapse	38	0.9981	0.002	0.4433	Organismal Systems	Nervous system	GABAergic synapse
ko04724 Glutamatergic synapse	50	0.9999	0.0002	0.9699	Organismal Systems	Nervous system	Glutamatergic synapse
ko04730 Long-term depression	27	0.9787	0.0215	0.916	Organismal Systems	Nervous system	Long-term depression
ko04723 Retrograde endocannabinoid signaling	46	0.9515	0.0486	0.9338	Organismal Systems	Nervous system	Retrograde endocannabinoid signaling
ko04726 Serotonergic synapse	49	0.9999	0.0002	0.9735	Organismal Systems	Nervous system	Serotonergic synapse
ko04721 Synaptic vesicle cycle	35	0.9892	0.0109	0.941	Organismal Systems	Nervous system	Synaptic vesicle cycle
ko04744 Phototransduction	14	0.9995	0.0006	0.097	Organismal Systems	Sensory system	Phototransduction

## Sheet: stress vs control wild
	NGenes	Up	Down	Mixed	Functional group	KEGG Sub-group	Pathway
ko04210 Apoptosis	45	0.6827	0.3174	0.0354	Cellular Processes	Cell growth and death	Apoptosis
ko04110 Cell cycle	88	1	0.0001	0.0001	Cellular Processes	Cell growth and death	Cell cycle
ko04111 Cell cycle - yeast	54	1	0.0001	0.0001	Cellular Processes	Cell growth and death	Cell cycle - yeast
ko04113 Meiosis - yeast	41	1	0.0001	0.0001	Cellular Processes	Cell growth and death	Meiosis - yeast
ko04115 p53 signaling pathway	38	0.9665	0.0336	0.6969	Cellular Processes	Cell growth and death	p53 signaling pathway
ko04146 Peroxisome	54	0.0443	0.9558	0.3966	Cellular Processes	Transport and catabolism	Peroxisome
ko04066 HIF-1 signaling pathway	47	0.0069	0.9932	0.2113	Environmental Information Processing	Signal transduction	HIF-1 signaling pathway
ko04391 Hippo signaling pathway - fly	29	0.9785	0.0216	0.2066	Environmental Information Processing	Signal transduction	Hippo signaling pathway - fly
ko04151 PI3K-Akt signaling pathway	149	0.014	0.9861	0.207	Environmental Information Processing	Signal transduction	PI3K-Akt signaling pathway
ko04512 ECM-receptor interaction	38	0.0346	0.9655	0.5651	Environmental Information Processing	Signaling molecules and interaction	ECM-receptor interaction
ko03050 Proteasome	40	0.9972	0.0029	0.101	Genetic Information Processing	Folding, sorting and degradation	Proteasome
ko03410 Base excision repair	28	1	0.0001	0.0001	Genetic Information Processing	Replication and repair	Base excision repair
ko03030 DNA replication	33	1	0.0001	0.0001	Genetic Information Processing	Replication and repair	DNA replication
ko03460 Fanconi anemia pathway	35	0.9919	0.0082	0.033	Genetic Information Processing	Replication and repair	Fanconi anemia pathway
ko03440 Homologous recombination	20	1	0.0001	0.0001	Genetic Information Processing	Replication and repair	Homologous recombination
ko03430 Mismatch repair	18	1	0.0001	0.0001	Genetic Information Processing	Replication and repair	Mismatch repair
ko03420 Nucleotide excision repair	35	0.9998	0.0004	0.0005	Genetic Information Processing	Replication and repair	Nucleotide excision repair
ko03022 Basal transcription factors	32	0.9951	0.005	0.1014	Genetic Information Processing	Transcription	Basal transcription factors
ko03020 RNA polymerase	27	0.9991	0.001	0.4194	Genetic Information Processing	Transcription	RNA polymerase
ko03040 Spliceosome	109	0.9999	0.0002	0.2275	Genetic Information Processing	Transcription	Spliceosome
ko03008 Ribosome biogenesis in eukaryotes	64	0.9912	0.0089	0.001	Genetic Information Processing	Translation	Ribosome biogenesis in eukaryotes
ko03013 RNA transport	111	0.9534	0.0467	0.8313	Genetic Information Processing	Translation	RNA transport
ko00250 Alanine, aspartate and glutamate metabolism	23	0.2331	0.767	0.0001	Metabolism	Amino acid metabolism	Alanine, aspartate and glutamate metabolism
ko00340 Histidine metabolism	14	0.1368	0.8633	0.009	Metabolism	Amino acid metabolism	Histidine metabolism
ko00380 Tryptophan metabolism	29	0.0215	0.9786	0.1892	Metabolism	Amino acid metabolism	Tryptophan metabolism
ko00350 Tyrosine metabolism	21	0.8631	0.137	0.0009	Metabolism	Amino acid metabolism	Tyrosine metabolism
ko00280 Valine, leucine and isoleucine degradation	35	0.0202	0.9799	0.4675	Metabolism	Amino acid metabolism	Valine, leucine and isoleucine degradation
ko00650 Butanoate metabolism	16	0.0055	0.9946	0.1608	Metabolism	Carbohydrate metabolism	Butanoate metabolism
ko00020 Citrate cycle (TCA cycle)	22	0.0001	1	0.3971	Metabolism	Carbohydrate metabolism	Citrate cycle (TCA cycle)
ko00052 Galactose metabolism	16	0.1937	0.8066	0.0126	Metabolism	Carbohydrate metabolism	Galactose metabolism
ko00010 Glycolysis / Gluconeogenesis	30	0.0002	0.9999	0.0086	Metabolism	Carbohydrate metabolism	Glycolysis / Gluconeogenesis
ko00500 Starch and sucrose metabolism	21	0.0008	0.9993	0.258	Metabolism	Carbohydrate metabolism	Starch and sucrose metabolism
ko00710 Carbon fixation in photosynthetic organisms	15	0.0155	0.9846	0.047	Metabolism	Energy metabolism	Carbon fixation in photosynthetic organisms
ko00190 Oxidative phosphorylation	105	0.0322	0.9679	0.9437	Metabolism	Energy metabolism	Oxidative phosphorylation
ko00604 Glycosphingolipid biosynthesis - ganglio series	11	0.0402	0.9599	0.2532	Metabolism	Glycan biosynthesis and metabolism	Glycosphingolipid biosynthesis - ganglio series
ko00510 N-Glycan biosynthesis	31	0.9881	0.012	0.3585	Metabolism	Glycan biosynthesis and metabolism	N-Glycan biosynthesis
ko01040 Biosynthesis of unsaturated fatty acids	15	0.0093	0.9908	0.5482	Metabolism	Lipid metabolism	Biosynthesis of unsaturated fatty acids
ko00565 Ether lipid metabolism	17	0.0001	1	0.3052	Metabolism	Lipid metabolism	Ether lipid metabolism
ko00071 Fatty acid degradation	24	0.0003	0.9998	0.1775	Metabolism	Lipid metabolism	Fatty acid degradation
ko00062 Fatty acid elongation	18	0.0024	0.9977	0.1279	Metabolism	Lipid metabolism	Fatty acid elongation
ko00561 Glycerolipid metabolism	25	0.0048	0.9953	0.0277	Metabolism	Lipid metabolism	Glycerolipid metabolism
ko00564 Glycerophospholipid metabolism	44	0.0115	0.9886	0.0042	Metabolism	Lipid metabolism	Glycerophospholipid metabolism
ko00120 Primary bile acid biosynthesis	12	0.0125	0.9876	0.3109	Metabolism	Lipid metabolism	Primary bile acid biosynthesis
ko00760 Nicotinate and nicotinamide metabolism	12	0.0047	0.9954	0.0168	Metabolism	Metabolism of cofactors and vitamins	Nicotinate and nicotinamide metabolism
ko00410 beta-Alanine metabolism	21	0.0191	0.981	0.0115	Metabolism	Metabolism of other amino acids	beta-Alanine metabolism
ko00230 Purine metabolism	104	1	0.0001	0.0131	Metabolism	Nucleotide metabolism	Purine metabolism
ko00240 Pyrimidine metabolism	73	1	0.0001	0.0013	Metabolism	Nucleotide metabolism	Pyrimidine metabolism
ko00983 Drug metabolism - other enzymes	19	0.0408	0.9593	0.3459	Metabolism	Xenobiotics biodegradation and metabolism	Drug metabolism - other enzymes
ko04260 Cardiac muscle contraction	41	0.0023	0.9978	0.6642	Organismal Systems	Circulatory system	Cardiac muscle contraction
ko04976 Bile secretion	39	0.011	0.9891	0.9643	Organismal Systems	Digestive system	Bile secretion
ko04973 Carbohydrate digestion and absorption	15	0.0008	0.9993	0.1348	Organismal Systems	Digestive system	Carbohydrate digestion and absorption
ko04975 Fat digestion and absorption	19	0.0087	0.9914	0.0462	Organismal Systems	Digestive system	Fat digestion and absorption
ko04971 Gastric acid secretion	27	0.0029	0.9972	0.4337	Organismal Systems	Digestive system	Gastric acid secretion
ko04978 Mineral absorption	25	0.0286	0.9715	0.2236	Organismal Systems	Digestive system	Mineral absorption
ko04972 Pancreatic secretion	43	0.0123	0.9878	0.9229	Organismal Systems	Digestive system	Pancreatic secretion
ko04974 Protein digestion and absorption	40	0.0174	0.9827	0.331	Organismal Systems	Digestive system	Protein digestion and absorption
ko04977 Vitamin digestion and absorption	17	0.0112	0.9889	0.0583	Organismal Systems	Digestive system	Vitamin digestion and absorption
ko04920 Adipocytokine signaling pathway	35	0.0014	0.9987	0.0469	Organismal Systems	Endocrine system	Adipocytokine signaling pathway
ko04911 Insulin secretion	37	0.0062	0.9939	0.8648	Organismal Systems	Endocrine system	Insulin secretion
ko04910 Insulin signaling pathway	56	0.0242	0.9759	0.8668	Organismal Systems	Endocrine system	Insulin signaling pathway
ko03320 PPAR signaling pathway	42	0.0001	1	0.0016	Organismal Systems	Endocrine system	PPAR signaling pathway
ko04914 Progesterone-mediated oocyte maturation	38	0.9953	0.0048	0.2821	Organismal Systems	Endocrine system	Progesterone-mediated oocyte maturation
ko04710 Circadian rhythm	19	0.0216	0.9785	0.0625	Organismal Systems	Environmental adaptation	Circadian rhythm
ko04960 Aldosterone-regulated sodium reabsorption	13	0.0488	0.9513	0.8943	Organismal Systems	Excretory system	Aldosterone-regulated sodium reabsorption
ko04964 Proximal tubule bicarbonate reclamation	11	0.0054	0.9947	0.1464	Organismal Systems	Excretory system	Proximal tubule bicarbonate reclamation
ko04612 Antigen processing and presentation	30	0.9468	0.0533	0.0017	Organismal Systems	Immune system	Antigen processing and presentation
ko04623 Cytosolic DNA-sensing pathway	34	0.998	0.0021	0.0192	Organismal Systems	Immune system	Cytosolic DNA-sensing pathway
ko04666 Fc gamma R-mediated phagocytosis	43	0.9564	0.0437	0.5568	Organismal Systems	Immune system	Fc gamma R-mediated phagocytosis
ko04650 Natural killer cell mediated cytotoxicity	40	0.992	0.0081	0.6184	Organismal Systems	Immune system	Natural killer cell mediated cytotoxicity

## Sheet: stress vs control domesticated
	NGenes	Up	Down	Mixed	Functional group	KEGG Sub-group	Pathway
ko04520 Adherens junction	44	0.0011	0.999	0.0439	Cellular Processes	Cell communication	Adherens junction
ko04540 Gap junction	39	0.9587	0.0414	0.7655	Cellular Processes	Cell communication	Gap junction
ko04110 Cell cycle	88	1	0.0001	0.0017	Cellular Processes	Cell growth and death	Cell cycle
ko04111 Cell cycle - yeast	54	1	0.0001	0.0024	Cellular Processes	Cell growth and death	Cell cycle - yeast
ko04113 Meiosis - yeast	41	0.9994	0.0007	0.0181	Cellular Processes	Cell growth and death	Meiosis - yeast
ko04114 Oocyte meiosis	51	0.6989	0.3012	0.0431	Cellular Processes	Cell growth and death	Oocyte meiosis
ko04115 p53 signaling pathway	38	0.9827	0.0175	0.0912	Cellular Processes	Cell growth and death	p53 signaling pathway
ko04144 Endocytosis	105	0.0296	0.9705	0.9858	Cellular Processes	Transport and catabolism	Endocytosis
ko04146 Peroxisome	54	0.0237	0.9764	0.0862	Cellular Processes	Transport and catabolism	Peroxisome
ko02010 ABC transporters	27	0.0474	0.9527	0.0042	Environmental Information Processing	Membrane transport	ABC transporters
ko04066 HIF-1 signaling pathway	47	0.0452	0.9549	0.1935	Environmental Information Processing	Signal transduction	HIF-1 signaling pathway
ko04391 Hippo signaling pathway - fly	29	0.9632	0.0369	0.3687	Environmental Information Processing	Signal transduction	Hippo signaling pathway - fly
ko04060 Cytokine-cytokine receptor interaction	94	0.0426	0.9575	0.8467	Environmental Information Processing	Signaling molecules and interaction	Cytokine-cytokine receptor interaction
ko04080 Neuroactive ligand-receptor interaction	112	0.0064	0.9937	0.9183	Environmental Information Processing	Signaling molecules and interaction	Neuroactive ligand-receptor interaction
ko03050 Proteasome	40	1	0.0001	0.0011	Genetic Information Processing	Folding, sorting and degradation	Proteasome
ko03410 Base excision repair	28	1	0.0001	0.0002	Genetic Information Processing	Replication and repair	Base excision repair
ko03030 DNA replication	33	1	0.0001	0.0001	Genetic Information Processing	Replication and repair	DNA replication
ko03460 Fanconi anemia pathway	35	0.9864	0.0137	0.0321	Genetic Information Processing	Replication and repair	Fanconi anemia pathway
ko03440 Homologous recombination	20	0.9998	0.0003	0.0934	Genetic Information Processing	Replication and repair	Homologous recombination
ko03430 Mismatch repair	18	1	0.0001	0.0018	Genetic Information Processing	Replication and repair	Mismatch repair
ko03420 Nucleotide excision repair	35	0.9935	0.0066	0.0011	Genetic Information Processing	Replication and repair	Nucleotide excision repair
ko03020 RNA polymerase	27	0.9991	0.001	0.5501	Genetic Information Processing	Transcription	RNA polymerase
ko03040 Spliceosome	109	0.9974	0.0027	0.0671	Genetic Information Processing	Transcription	Spliceosome
ko03008 Ribosome biogenesis in eukaryotes	64	0.9666	0.0335	0.0237	Genetic Information Processing	Translation	Ribosome biogenesis in eukaryotes
ko00250 Alanine, aspartate and glutamate metabolism	23	0.4811	0.5192	0.0014	Metabolism	Amino acid metabolism	Alanine, aspartate and glutamate metabolism
ko00650 Butanoate metabolism	16	0.0345	0.9656	0.1252	Metabolism	Carbohydrate metabolism	Butanoate metabolism
ko00020 Citrate cycle (TCA cycle)	22	0.0002	0.9999	0.5877	Metabolism	Carbohydrate metabolism	Citrate cycle (TCA cycle)
ko00010 Glycolysis / Gluconeogenesis	30	0.0162	0.9839	0.6861	Metabolism	Carbohydrate metabolism	Glycolysis / Gluconeogenesis
ko00500 Starch and sucrose metabolism	21	0.0033	0.9968	0.2625	Metabolism	Carbohydrate metabolism	Starch and sucrose metabolism
ko00710 Carbon fixation in photosynthetic organisms	15	0.0106	0.9895	0.0429	Metabolism	Energy metabolism	Carbon fixation in photosynthetic organisms
ko00190 Oxidative phosphorylation	105	0.013	0.9871	0.5083	Metabolism	Energy metabolism	Oxidative phosphorylation
ko01040 Biosynthesis of unsaturated fatty acids	15	0.0009	0.9992	0.051	Metabolism	Lipid metabolism	Biosynthesis of unsaturated fatty acids
ko00565 Ether lipid metabolism	17	0.0001	1	0.1713	Metabolism	Lipid metabolism	Ether lipid metabolism
ko00071 Fatty acid degradation	24	0.0277	0.9724	0.0937	Metabolism	Lipid metabolism	Fatty acid degradation
ko00062 Fatty acid elongation	18	0.0005	0.9996	0.522	Metabolism	Lipid metabolism	Fatty acid elongation
ko00564 Glycerophospholipid metabolism	44	0.0067	0.9934	0.1451	Metabolism	Lipid metabolism	Glycerophospholipid metabolism
ko00120 Primary bile acid biosynthesis	12	0.0537	0.9464	0.0211	Metabolism	Lipid metabolism	Primary bile acid biosynthesis
ko00140 Steroid hormone biosynthesis	20	0.04	0.9601	0.3639	Metabolism	Lipid metabolism	Steroid hormone biosynthesis
ko00760 Nicotinate and nicotinamide metabolism	12	0.0345	0.9656	0.5266	Metabolism	Metabolism of cofactors and vitamins	Nicotinate and nicotinamide metabolism
ko00860 Porphyrin and chlorophyll metabolism	20	0.017	0.9831	0.2293	Metabolism	Metabolism of cofactors and vitamins	Porphyrin and chlorophyll metabolism
ko00230 Purine metabolism	104	1	0.0001	0.0064	Metabolism	Nucleotide metabolism	Purine metabolism
ko00240 Pyrimidine metabolism	73	0.9997	0.0004	0.0002	Metabolism	Nucleotide metabolism	Pyrimidine metabolism
ko00983 Drug metabolism - other enzymes	19	0.0037	0.9964	0.0229	Metabolism	Xenobiotics biodegradation and metabolism	Drug metabolism - other enzymes
ko04260 Cardiac muscle contraction	41	0.0209	0.9792	0.6909	Organismal Systems	Circulatory system	Cardiac muscle contraction
ko04973 Carbohydrate digestion and absorption	15	0.0088	0.9913	0.0352	Organismal Systems	Digestive system	Carbohydrate digestion and absorption
ko04975 Fat digestion and absorption	19	0.0421	0.958	0.1289	Organismal Systems	Digestive system	Fat digestion and absorption
ko04977 Vitamin digestion and absorption	17	0.0027	0.9974	0.1781	Organismal Systems	Digestive system	Vitamin digestion and absorption
ko03320 PPAR signaling pathway	42	0.003	0.9971	0.0009	Organismal Systems	Endocrine system	PPAR signaling pathway
ko04612 Antigen processing and presentation	30	0.9944	0.0057	0.0004	Organismal Systems	Immune system	Antigen processing and presentation
ko04662 B cell receptor signaling pathway	39	0.9285	0.0716	0.0386	Organismal Systems	Immune system	B cell receptor signaling pathway
ko04623 Cytosolic DNA-sensing pathway	34	0.9992	0.0009	0.4334	Organismal Systems	Immune system	Cytosolic DNA-sensing pathway
ko04664 Fc epsilon RI signaling pathway	29	0.9717	0.0284	0.0741	Organismal Systems	Immune system	Fc epsilon RI signaling pathway
ko04666 Fc gamma R-mediated phagocytosis	43	0.9999	0.0002	0.0784	Organismal Systems	Immune system	Fc gamma R-mediated phagocytosis
ko04650 Natural killer cell mediated cytotoxicity	40	0.9965	0.0036	0.1423	Organismal Systems	Immune system	Natural killer cell mediated cytotoxicity
ko04730 Long-term depression	27	0.9618	0.0383	0.4737	Organismal Systems	Nervous system	Long-term depression

## Sheet: stress vs control WD
	NGenes	Up	Down	Mixed	Functional group	KEGG Sub-group	Pathway
ko04520 Adherens junction	44	0.0095	0.9906	0.8478	Cellular Processes	Cell communication	Adherens junction
ko04210 Apoptosis	45	0.3984	0.6017	0.0325	Cellular Processes	Cell growth and death	Apoptosis
ko04110 Cell cycle	88	1	0.0001	0.0001	Cellular Processes	Cell growth and death	Cell cycle
ko04111 Cell cycle - yeast	54	1	0.0001	0.0065	Cellular Processes	Cell growth and death	Cell cycle - yeast
ko04113 Meiosis - yeast	41	0.9935	0.0066	0.0034	Cellular Processes	Cell growth and death	Meiosis - yeast
ko04115 p53 signaling pathway	38	0.9542	0.0459	0.0007	Cellular Processes	Cell growth and death	p53 signaling pathway
ko04145 Phagosome	76	0.208	0.7921	0.0167	Cellular Processes	Transport and catabolism	Phagosome
ko02010 ABC transporters	27	0.0437	0.9564	0.0713	Environmental Information Processing	Membrane transport	ABC transporters
ko04080 Neuroactive ligand-receptor interaction	112	0.0261	0.974	0.8871	Environmental Information Processing	Signaling molecules and interaction	Neuroactive ligand-receptor interaction
ko03050 Proteasome	40	1	0.0001	0.0001	Genetic Information Processing	Folding, sorting and degradation	Proteasome
ko03018 RNA degradation	50	0.9998	0.0003	0.1603	Genetic Information Processing	Folding, sorting and degradation	RNA degradation
ko03410 Base excision repair	28	1	0.0001	0.0005	Genetic Information Processing	Replication and repair	Base excision repair
ko03030 DNA replication	33	1	0.0001	0.0001	Genetic Information Processing	Replication and repair	DNA replication
ko03460 Fanconi anemia pathway	35	0.9923	0.0078	0.0964	Genetic Information Processing	Replication and repair	Fanconi anemia pathway
ko03440 Homologous recombination	20	0.9891	0.011	0.0001	Genetic Information Processing	Replication and repair	Homologous recombination
ko03430 Mismatch repair	18	1	0.0001	0.0001	Genetic Information Processing	Replication and repair	Mismatch repair
ko03420 Nucleotide excision repair	35	1	0.0001	0.001	Genetic Information Processing	Replication and repair	Nucleotide excision repair
ko03020 RNA polymerase	27	0.973	0.0271	0.4711	Genetic Information Processing	Transcription	RNA polymerase
ko03040 Spliceosome	109	0.9994	0.0007	0.0471	Genetic Information Processing	Transcription	Spliceosome
ko03015 mRNA surveillance pathway	52	0.9698	0.0304	0.467	Genetic Information Processing	Translation	mRNA surveillance pathway
ko03008 Ribosome biogenesis in eukaryotes	64	0.9997	0.0004	0.0026	Genetic Information Processing	Translation	Ribosome biogenesis in eukaryotes
ko03013 RNA transport	111	0.9931	0.007	0.0955	Genetic Information Processing	Translation	RNA transport
ko00250 Alanine, aspartate and glutamate metabolism	23	0.1654	0.8347	0.0003	Metabolism	Amino acid metabolism	Alanine, aspartate and glutamate metabolism
ko00330 Arginine and proline metabolism	36	0.0288	0.9713	0.2288	Metabolism	Amino acid metabolism	Arginine and proline metabolism
ko00360 Phenylalanine metabolism	11	0.0099	0.9903	0.1266	Metabolism	Amino acid metabolism	Phenylalanine metabolism
ko00350 Tyrosine metabolism	21	0.2316	0.7687	0.0026	Metabolism	Amino acid metabolism	Tyrosine metabolism
ko00520 Amino sugar and nucleotide sugar metabolism	35	0.0043	0.9958	0.8311	Metabolism	Carbohydrate metabolism	Amino sugar and nucleotide sugar metabolism
ko00020 Citrate cycle (TCA cycle)	22	0.0002	0.9999	0.2115	Metabolism	Carbohydrate metabolism	Citrate cycle (TCA cycle)
ko00051 Fructose and mannose metabolism	19	0.0279	0.9722	0.2123	Metabolism	Carbohydrate metabolism	Fructose and mannose metabolism
ko00052 Galactose metabolism	16	0.02	0.9801	0.05	Metabolism	Carbohydrate metabolism	Galactose metabolism
ko00010 Glycolysis / Gluconeogenesis	30	0.0001	1	0.0059	Metabolism	Carbohydrate metabolism	Glycolysis / Gluconeogenesis
ko00500 Starch and sucrose metabolism	21	0.0024	0.9977	0.2151	Metabolism	Carbohydrate metabolism	Starch and sucrose metabolism
ko00710 Carbon fixation in photosynthetic organisms	15	0.0075	0.9926	0.0015	Metabolism	Energy metabolism	Carbon fixation in photosynthetic organisms
ko00190 Oxidative phosphorylation	105	0.0002	0.9999	0.4378	Metabolism	Energy metabolism	Oxidative phosphorylation
ko00534 Glycosaminoglycan biosynthesis - heparan sulfate / heparin	11	0.047	0.9531	0.9422	Metabolism	Glycan biosynthesis and metabolism	Glycosaminoglycan biosynthesis - heparan sulfate / heparin
ko00565 Ether lipid metabolism	17	0.0409	0.9593	0.2376	Metabolism	Lipid metabolism	Ether lipid metabolism
ko00071 Fatty acid degradation	24	0.0016	0.9985	0.0737	Metabolism	Lipid metabolism	Fatty acid degradation
ko00561 Glycerolipid metabolism	25	0.0033	0.9968	0.0676	Metabolism	Lipid metabolism	Glycerolipid metabolism
ko00564 Glycerophospholipid metabolism	44	0.0117	0.9884	0.0874	Metabolism	Lipid metabolism	Glycerophospholipid metabolism
ko00670 One carbon pool by folate	13	0.892	0.1082	0.0348	Metabolism	Metabolism of cofactors and vitamins	One carbon pool by folate
ko00900 Terpenoid backbone biosynthesis	15	0.9522	0.0479	0.596	Metabolism	Metabolism of terpenoids and polyketides	Terpenoid backbone biosynthesis
ko00230 Purine metabolism	104	0.9985	0.0016	0.0002	Metabolism	Nucleotide metabolism	Purine metabolism
ko00240 Pyrimidine metabolism	73	1	0.0001	0.0009	Metabolism	Nucleotide metabolism	Pyrimidine metabolism
ko00983 Drug metabolism - other enzymes	19	0.0615	0.9386	0.0226	Metabolism	Xenobiotics biodegradation and metabolism	Drug metabolism - other enzymes
ko04260 Cardiac muscle contraction	41	0.0002	0.9999	0.0329	Organismal Systems	Circulatory system	Cardiac muscle contraction
ko04270 Vascular smooth muscle contraction	55	0.0061	0.994	0.3986	Organismal Systems	Circulatory system	Vascular smooth muscle contraction
ko04973 Carbohydrate digestion and absorption	15	0.0379	0.9622	0.5129	Organismal Systems	Digestive system	Carbohydrate digestion and absorption
ko04975 Fat digestion and absorption	19	0.0028	0.9973	0.2014	Organismal Systems	Digestive system	Fat digestion and absorption
ko04972 Pancreatic secretion	43	0.0091	0.991	0.5106	Organismal Systems	Digestive system	Pancreatic secretion
ko04977 Vitamin digestion and absorption	17	0.0482	0.9519	0.1113	Organismal Systems	Digestive system	Vitamin digestion and absorption
ko04920 Adipocytokine signaling pathway	35	0.0006	0.9995	0.391	Organismal Systems	Endocrine system	Adipocytokine signaling pathway
ko04910 Insulin signaling pathway	56	0.0163	0.9838	0.8141	Organismal Systems	Endocrine system	Insulin signaling pathway
ko03320 PPAR signaling pathway	42	0.0001	1	0.0006	Organismal Systems	Endocrine system	PPAR signaling pathway
ko04914 Progesterone-mediated oocyte maturation	38	0.9604	0.0397	0.6245	Organismal Systems	Endocrine system	Progesterone-mediated oocyte maturation
ko04966 Collecting duct acid secretion	14	0.0043	0.9958	0.7052	Organismal Systems	Excretory system	Collecting duct acid secretion
ko04964 Proximal tubule bicarbonate reclamation	11	0.0275	0.9726	0.0752	Organismal Systems	Excretory system	Proximal tubule bicarbonate reclamation
ko04612 Antigen processing and presentation	30	0.9792	0.0209	0.0001	Organismal Systems	Immune system	Antigen processing and presentation
ko04623 Cytosolic DNA-sensing pathway	34	0.9168	0.0835	0.0339	Organismal Systems	Immune system	Cytosolic DNA-sensing pathway

## Sheet: stress vs control DW
	NGenes	Up	Down	Mixed	Functional group	KEGG Sub-group	Pathway
ko04520 Adherens junction	44	0.0086	0.9915	0.575	Cellular Processes	Cell communication	Adherens junction
ko04210 Apoptosis	45	0.1344	0.8658	0.0357	Cellular Processes	Cell growth and death	Apoptosis
ko04110 Cell cycle	88	1	0.0001	0.0001	Cellular Processes	Cell growth and death	Cell cycle
ko04111 Cell cycle - yeast	54	1	0.0001	0.0001	Cellular Processes	Cell growth and death	Cell cycle - yeast
ko04113 Meiosis - yeast	41	0.9983	0.0018	0.0001	Cellular Processes	Cell growth and death	Meiosis - yeast
ko04115 p53 signaling pathway	38	0.6728	0.3274	0.002	Cellular Processes	Cell growth and death	p53 signaling pathway
ko04144 Endocytosis	105	0.0054	0.9947	0.9989	Cellular Processes	Transport and catabolism	Endocytosis
ko04140 Regulation of autophagy	13	0.0221	0.978	0.6306	Cellular Processes	Transport and catabolism	Regulation of autophagy
ko04012 ErbB signaling pathway	40	0.9536	0.0465	0.4218	Environmental Information Processing	Signal transduction	ErbB signaling pathway
ko04066 HIF-1 signaling pathway	47	0.0059	0.9942	0.3622	Environmental Information Processing	Signal transduction	HIF-1 signaling pathway
ko04010 MAPK signaling pathway	110	0.0476	0.9525	0.9989	Environmental Information Processing	Signal transduction	MAPK signaling pathway
ko04151 PI3K-Akt signaling pathway	149	0.0352	0.9649	0.7774	Environmental Information Processing	Signal transduction	PI3K-Akt signaling pathway
ko04080 Neuroactive ligand-receptor interaction	112	0.0046	0.9955	0.9773	Environmental Information Processing	Signaling molecules and interaction	Neuroactive ligand-receptor interaction
ko03050 Proteasome	40	0.9931	0.007	0.0282	Genetic Information Processing	Folding, sorting and degradation	Proteasome
ko03018 RNA degradation	50	0.992	0.0081	0.1653	Genetic Information Processing	Folding, sorting and degradation	RNA degradation
ko03410 Base excision repair	28	1	0.0001	0.0043	Genetic Information Processing	Replication and repair	Base excision repair
ko03030 DNA replication	33	1	0.0001	0.0001	Genetic Information Processing	Replication and repair	DNA replication
ko03460 Fanconi anemia pathway	35	0.9884	0.0117	0.256	Genetic Information Processing	Replication and repair	Fanconi anemia pathway
ko03440 Homologous recombination	20	0.9763	0.0238	0.0013	Genetic Information Processing	Replication and repair	Homologous recombination
ko03430 Mismatch repair	18	1	0.0001	0.0001	Genetic Information Processing	Replication and repair	Mismatch repair
ko03420 Nucleotide excision repair	35	1	0.0001	0.0001	Genetic Information Processing	Replication and repair	Nucleotide excision repair
ko03020 RNA polymerase	27	0.9684	0.0317	0.1272	Genetic Information Processing	Transcription	RNA polymerase
ko03040 Spliceosome	109	0.9944	0.0057	0.0002	Genetic Information Processing	Transcription	Spliceosome
ko03010 Ribosome	118	0.9713	0.0288	0.7075	Genetic Information Processing	Translation	Ribosome
ko03008 Ribosome biogenesis in eukaryotes	64	0.9936	0.0066	0.0242	Genetic Information Processing	Translation	Ribosome biogenesis in eukaryotes
ko00250 Alanine, aspartate and glutamate metabolism	23	0.3707	0.6294	0.0001	Metabolism	Amino acid metabolism	Alanine, aspartate and glutamate metabolism
ko00340 Histidine metabolism	14	0.641	0.3591	0.0009	Metabolism	Amino acid metabolism	Histidine metabolism
ko00360 Phenylalanine metabolism	11	0.7482	0.252	0.0079	Metabolism	Amino acid metabolism	Phenylalanine metabolism
ko00350 Tyrosine metabolism	21	0.9413	0.0589	0.0004	Metabolism	Amino acid metabolism	Tyrosine metabolism
ko00020 Citrate cycle (TCA cycle)	22	0.0007	0.9994	0.2569	Metabolism	Carbohydrate metabolism	Citrate cycle (TCA cycle)
ko00010 Glycolysis / Gluconeogenesis	30	0.0001	1	0.0041	Metabolism	Carbohydrate metabolism	Glycolysis / Gluconeogenesis
ko00630 Glyoxylate and dicarboxylate metabolism	20	0.6623	0.3378	0.0012	Metabolism	Carbohydrate metabolism	Glyoxylate and dicarboxylate metabolism
ko00640 Propanoate metabolism	22	0.048	0.9522	0.4596	Metabolism	Carbohydrate metabolism	Propanoate metabolism
ko00620 Pyruvate metabolism	25	0.334	0.6661	0.0037	Metabolism	Carbohydrate metabolism	Pyruvate metabolism
ko00500 Starch and sucrose metabolism	21	0.009	0.9911	0.1406	Metabolism	Carbohydrate metabolism	Starch and sucrose metabolism
ko00710 Carbon fixation in photosynthetic organisms	15	0.0137	0.9865	0.0014	Metabolism	Energy metabolism	Carbon fixation in photosynthetic organisms
ko00680 Methane metabolism	14	0.8619	0.1382	0.0058	Metabolism	Energy metabolism	Methane metabolism
ko00190 Oxidative phosphorylation	105	0.0293	0.9708	0.6141	Metabolism	Energy metabolism	Oxidative phosphorylation
ko00510 N-Glycan biosynthesis	31	0.9809	0.0192	0.2019	Metabolism	Glycan biosynthesis and metabolism	N-Glycan biosynthesis
ko00513 Various types of N-glycan biosynthesis	20	0.9651	0.035	0.2072	Metabolism	Glycan biosynthesis and metabolism	Various types of N-glycan biosynthesis
ko00565 Ether lipid metabolism	17	0.0024	0.9977	0.8053	Metabolism	Lipid metabolism	Ether lipid metabolism
ko00071 Fatty acid degradation	24	0.0033	0.9968	0.1096	Metabolism	Lipid metabolism	Fatty acid degradation
ko00561 Glycerolipid metabolism	25	0.023	0.9771	0.2022	Metabolism	Lipid metabolism	Glycerolipid metabolism
ko00564 Glycerophospholipid metabolism	44	0.0007	0.9994	0.8815	Metabolism	Lipid metabolism	Glycerophospholipid metabolism
ko00120 Primary bile acid biosynthesis	12	0.0143	0.9859	0.0676	Metabolism	Lipid metabolism	Primary bile acid biosynthesis
ko00760 Nicotinate and nicotinamide metabolism	12	0.0129	0.9872	0.0048	Metabolism	Metabolism of cofactors and vitamins	Nicotinate and nicotinamide metabolism
ko00670 One carbon pool by folate	13	0.9947	0.0054	0.0076	Metabolism	Metabolism of cofactors and vitamins	One carbon pool by folate
ko00480 Glutathione metabolism	23	0.9549	0.0452	0.3553	Metabolism	Metabolism of other amino acids	Glutathione metabolism
ko00900 Terpenoid backbone biosynthesis	15	0.9737	0.0264	0.1119	Metabolism	Metabolism of terpenoids and polyketides	Terpenoid backbone biosynthesis
ko00230 Purine metabolism	104	0.9981	0.002	0.0003	Metabolism	Nucleotide metabolism	Purine metabolism
ko00240 Pyrimidine metabolism	73	1	0.0001	0.0001	Metabolism	Nucleotide metabolism	Pyrimidine metabolism
ko00983 Drug metabolism - other enzymes	19	0.5116	0.4888	0.0186	Metabolism	Xenobiotics biodegradation and metabolism	Drug metabolism - other enzymes
ko00980 Metabolism of xenobiotics by cytochrome P450	15	0.9837	0.0164	0.585	Metabolism	Xenobiotics biodegradation and metabolism	Metabolism of xenobiotics by cytochrome P450
ko04260 Cardiac muscle contraction	41	0.0076	0.9925	0.4602	Organismal Systems	Circulatory system	Cardiac muscle contraction
ko04270 Vascular smooth muscle contraction	55	0.0007	0.9994	0.8859	Organismal Systems	Circulatory system	Vascular smooth muscle contraction
ko04976 Bile secretion	39	0.0318	0.9683	0.2041	Organismal Systems	Digestive system	Bile secretion
ko04973 Carbohydrate digestion and absorption	15	0.0259	0.9742	0.3563	Organismal Systems	Digestive system	Carbohydrate digestion and absorption
ko04975 Fat digestion and absorption	19	0.0004	0.9997	0.0553	Organismal Systems	Digestive system	Fat digestion and absorption
ko04971 Gastric acid secretion	27	0.0383	0.9618	0.3378	Organismal Systems	Digestive system	Gastric acid secretion
ko04972 Pancreatic secretion	43	0.0023	0.9978	0.5246	Organismal Systems	Digestive system	Pancreatic secretion
ko04974 Protein digestion and absorption	40	0.0224	0.9777	0.6602	Organismal Systems	Digestive system	Protein digestion and absorption
ko04977 Vitamin digestion and absorption	17	0.0046	0.9955	0.0577	Organismal Systems	Digestive system	Vitamin digestion and absorption
ko04920 Adipocytokine signaling pathway	35	0.0001	1	0.1514	Organismal Systems	Endocrine system	Adipocytokine signaling pathway
ko04911 Insulin secretion	37	0.0003	0.9998	0.7061	Organismal Systems	Endocrine system	Insulin secretion
ko04910 Insulin signaling pathway	56	0.0009	0.9992	0.3936	Organismal Systems	Endocrine system	Insulin signaling pathway
ko03320 PPAR signaling pathway	42	0.0001	1	0.0094	Organismal Systems	Endocrine system	PPAR signaling pathway
ko04914 Progesterone-mediated oocyte maturation	38	0.9992	0.0009	0.0667	Organismal Systems	Endocrine system	Progesterone-mediated oocyte maturation
ko04710 Circadian rhythm	19	0.0324	0.9677	0.6838	Organismal Systems	Environmental adaptation	Circadian rhythm
ko04964 Proximal tubule bicarbonate reclamation	11	0.0729	0.9273	0.0001	Organismal Systems	Excretory system	Proximal tubule bicarbonate reclamation
ko04612 Antigen processing and presentation	30	0.8781	0.122	0.0072	Organismal Systems	Immune system	Antigen processing and presentation
ko04623 Cytosolic DNA-sensing pathway	34	0.9007	0.0994	0.0253	Organismal Systems	Immune system	Cytosolic DNA-sensing pathway
ko04650 Natural killer cell mediated cytotoxicity	40	0.9814	0.0187	0.796	Organismal Systems	Immune system	Natural killer cell mediated cytotoxicity
ko04660 T cell receptor signaling pathway	61	0.9823	0.0178	0.6714	Organismal Systems	Immune system	T cell receptor signaling pathway
ko04727 GABAergic synapse	38	0.0009	0.9992	0.3213	Organismal Systems	Nervous system	GABAergic synapse
ko04724 Glutamatergic synapse	50	0.0123	0.9878	0.939	Organismal Systems	Nervous system	Glutamatergic synapse
ko04730 Long-term depression	27	0.0334	0.9667	0.8378	Organismal Systems	Nervous system	Long-term depression
ko04720 Long-term potentiation	28	0.0105	0.9896	0.4767	Organismal Systems	Nervous system	Long-term potentiation
ko04723 Retrograde endocannabinoid signaling	46	0.0015	0.9986	0.7351	Organismal Systems	Nervous system	Retrograde endocannabinoid signaling
ko04742 Taste transduction	11	0.0254	0.9748	0.5364	Organismal Systems	Sensory system	Taste transduction
